# Supplementary material for: Does early vitamin B12 supplementation improve neurodevelopment and cognitive function in childhood and into school age: a study protocol for extended follow-ups from randomised controlled trials in India and Tanzania
Source: PubMed Central journal article supplement — BMJ Open. 2018 Feb 22;8(2):e018962. doi: 10.1136/bmjopen-2017-018962 (PMC5855385; doi:10.1136/bmjopen-2017-018962), 2018-02-22
Supplement: bmjopen-2017-018962.draft_revisions.pdf [file bmjopen-2017-018962.draft_revisions.pdf]

# BMJ Open

BMJ Open is committed to open peer review. As part of this commitment we make the peer review history of every article we publish publicly available.

When an article is published we post the peer reviewers' comments and the authors' responses online. We also post the versions of the paper that were used during peer review. These are the versions that the peer review comments apply to.

The versions of the paper that follow are the versions that were submitted during the peer review process. They are not the versions of record or the final published versions. They should not be cited or distributed as the published version of this manuscript.

BMJ Open is an open access journal and the full, final, typeset and author-corrected version of record of the manuscript is available on our site with no access controls, subscription charges or pay-per-view fees (<http://bmjopen.bmj.com>).

If you have any questions on BMJ Open's open peer review process please email [editorial.bmjopen@bmj.com](mailto:editorial.bmjopen@bmj.com)

# BMJ Open

## Impact of vitamin B12 on neurodevelopment and cognitive function from early life into school age, extended follow-ups from randomized controlled trials

|                               |                                                                                                                                                                                                                                                                                                                                                                                                                                                                                                                                                                                                                                                                                                                                                                                                                                                                                                                                                                                                                                                                                                                                                                                                                                                                                                                                                                                                                                                                                                                                                                                                                                                                                                                                                          |
|-------------------------------|----------------------------------------------------------------------------------------------------------------------------------------------------------------------------------------------------------------------------------------------------------------------------------------------------------------------------------------------------------------------------------------------------------------------------------------------------------------------------------------------------------------------------------------------------------------------------------------------------------------------------------------------------------------------------------------------------------------------------------------------------------------------------------------------------------------------------------------------------------------------------------------------------------------------------------------------------------------------------------------------------------------------------------------------------------------------------------------------------------------------------------------------------------------------------------------------------------------------------------------------------------------------------------------------------------------------------------------------------------------------------------------------------------------------------------------------------------------------------------------------------------------------------------------------------------------------------------------------------------------------------------------------------------------------------------------------------------------------------------------------------------|
| Journal:                      | <i>BMJ Open</i>                                                                                                                                                                                                                                                                                                                                                                                                                                                                                                                                                                                                                                                                                                                                                                                                                                                                                                                                                                                                                                                                                                                                                                                                                                                                                                                                                                                                                                                                                                                                                                                                                                                                                                                                          |
| Manuscript ID                 | bmjopen-2017-018962                                                                                                                                                                                                                                                                                                                                                                                                                                                                                                                                                                                                                                                                                                                                                                                                                                                                                                                                                                                                                                                                                                                                                                                                                                                                                                                                                                                                                                                                                                                                                                                                                                                                                                                                      |
| Article Type:                 | Protocol                                                                                                                                                                                                                                                                                                                                                                                                                                                                                                                                                                                                                                                                                                                                                                                                                                                                                                                                                                                                                                                                                                                                                                                                                                                                                                                                                                                                                                                                                                                                                                                                                                                                                                                                                 |
| Date Submitted by the Author: | 02-Aug-2017                                                                                                                                                                                                                                                                                                                                                                                                                                                                                                                                                                                                                                                                                                                                                                                                                                                                                                                                                                                                                                                                                                                                                                                                                                                                                                                                                                                                                                                                                                                                                                                                                                                                                                                                              |
| Complete List of Authors:     | <p>Winje, Brita; Norwegian Institute of Public Health, Department of vaccine preventable diseases<br/> Kvestad, Ingrid; Uni Health, Uni Research, Regional Centre for Child and Youth Mental Health and Child Welfare<br/> Krishnamachari, Srinivasan ; St. John's Research Institute, Division of Mental Health &amp; Neurosciences<br/> Manji, Karim; Muhibili University of Health and Allied Sciences, Department of Pediatrics and Child Health<br/> Taneja, Sunita; Centre for Health Research and Development, Society for Applied Studies<br/> Bellinger, David; Children's Hospital Boston<br/> Bhandari, Nita; Society for applied studies, Centre for Health Research and Development<br/> Bisht, Shruti; Centre for Health Research and Development, Society for Applied Studies<br/> Darling, Anne Marie; Harvard T.H. Chan School of Public Health, Department of Global Health and Population<br/> Duggan, Christopher; Children's Hospital Boston<br/> Fawzi, Wafaie.; Harvard T.H. Chan School of Public Health, Department of Global Health and Population<br/> Hysing, Mari; Uni Health, Uni Research, Regional Centre for Child and Youth Mental Health and Child Welfare<br/> Kumar, Tivendra; Society for applied studies, Centre for Health Research and Development<br/> Kurpad, Anura; St. John's Research Institute, Division of Nutrition<br/> Sudfeld, CR; Harvard University T H Chan School of Public Health, Departments of Global Health and Population<br/> Svensen, Erling; Haukeland University Hospital, Helse Bergen<br/> Thomas, Susan; St. John's Research Institute, Division of Mental Health and Neurosciences<br/> Strand, TA; University of Bergen, Faculty of Medicine, Centre for International Health</p> |
| Keywords:                     | Vitamin B12, neurodevelopment, cognitive function, event related potential, executive function, growth                                                                                                                                                                                                                                                                                                                                                                                                                                                                                                                                                                                                                                                                                                                                                                                                                                                                                                                                                                                                                                                                                                                                                                                                                                                                                                                                                                                                                                                                                                                                                                                                                                                   |
|                               |                                                                                                                                                                                                                                                                                                                                                                                                                                                                                                                                                                                                                                                                                                                                                                                                                                                                                                                                                                                                                                                                                                                                                                                                                                                                                                                                                                                                                                                                                                                                                                                                                                                                                                                                                          |

1  
2  
3  
4  
5  
6  
7  
8  
9  
10  
11  
12  
13  
14  
15  
16  
17  
18  
19  
20  
21  
22  
23  
24  
25  
26  
27  
28  
29  
30  
31  
32  
33  
34  
35  
36  
37  
38  
39  
40  
41  
42  
43  
44  
45  
46  
47  
48  
49  
50  
51  
52  
53  
54  
55  
56  
57  
58  
59  
60

SCHOLARONE™  
Manuscripts

For peer review only

## Impact of vitamin B12 on neurodevelopment and cognitive function from early life into school age, extended follow-ups from randomized controlled trials

Corresponding author:

**Tor Arne Strand**, Centre for International Health, Faculty of Medicine, University of Bergen, P.O. Box 7804, 5020 Bergen, Norway, e-mail: [tor.strand@uib.no](mailto:tor.strand@uib.no) phone: +47 90971086

Authors:

**Brita Askeland Winje**, Department of vaccine preventable diseases, Norwegian Institute of Public Health, Oslo, Norway, [brita.winje@fhi.no](mailto:brita.winje@fhi.no)

**Ingrid Kvestad**, Regional Centre for Child and Youth Mental Health and Child Welfare, Uni Health, Bergen, Norway, [Ingrid.Kvestad@uib.no](mailto:Ingrid.Kvestad@uib.no)

**Srinivasan Krishnamachari**, Division of Mental Health & Neurosciences, St. John's Research Institute, Bangalore, 560034 India, [srinivasanstjohns@gmail.com](mailto:srinivasanstjohns@gmail.com)

**Karim Manji**, Department of Pediatrics and Child Health, Muhibili University of Health and Allied Sciences, Dar es Salaam, Tanzania, [kpmanji@gmail.com](mailto:kpmanji@gmail.com)

**SunitaTaneja**, Centre for Health Research and Development, Society of Applied Studies, New Delhi, India, [sunita.taneja@sas.org.in](mailto:sunita.taneja@sas.org.in)

**David C Bellinger**, Children's Hospital Boston, Boston, MA, USA, [David.Bellinger@childrens.harvard.edu](mailto:David.Bellinger@childrens.harvard.edu)

**Nita Bhandari**, Centre for Health Research and Development, Society of Applied Studies, New Delhi, India, [Nita.Bhandari@sas.org.in](mailto:Nita.Bhandari@sas.org.in)

**Shruti Bisht**, Centre for Health Research and Development, Society of Applied Studies, New Delhi, India, [shruti.bisht@sas.org.in](mailto:shruti.bisht@sas.org.in)

**Anne Marie Darling**, Department of Global Health and Population, Harvard T.H. Chan School of Public Health, Boston, MA, USA, e-mail: [adarling@hsph.harvard.edu](mailto:adarling@hsph.harvard.edu)

**Christopher P Duggan**, Children's Hospital Boston, Boston, MA, USA, e-mail: [christopher.duggan@childrens.harvard.edu](mailto:christopher.duggan@childrens.harvard.edu)

**Wafaie Fawzi**, Department of Global Health and Population, Harvard T.H. Chan School of Public Health [mina@hsph.harvard.edu](mailto:mina@hsph.harvard.edu)

**Mari Hysing**, Regional Centre for Child and Youth Mental Health and Child Welfare, Uni Research Health, Bergen, Norway, [Mari.Hysing@uni.no](mailto:Mari.Hysing@uni.no)

**Tivendra Kumar**, Centre for Health Research and Development, Society of Applied Studies, New Delhi, India, e-mail: [drtivendra@gmail.com](mailto:drtivendra@gmail.com)

**Anura Kurpad**, Division of Nutrition, St. John's Research Institute, Bangalore-560034, India,

1  
2  
3 [a.kurpad@sjri.res.in](mailto:a.kurpad@sjri.res.in)

4  
5 **Christopher Sudfeld**, Department of Global Health and Population, Harvard T.H. Chan School of  
6 Public Health, Boston, MA, USA e-mail: [csudfeld@hsph.harvard.edu](mailto:csudfeld@hsph.harvard.edu)

7  
8 **Erling Svendsen**, Haukeland University Hospital, Helse Bergen, Bergen, Norway,  
9 [Erling.Svensen@uib.no](mailto:Erling.Svensen@uib.no)

10  
11 **Susan Thomas**, Division of Mental Health & Neurosciences, St. John's Research Institute, Bangalore,  
12 560034, India, [susansusmi@gmail.com](mailto:susansusmi@gmail.com)

13  
14 **Tor Arne Strand**, Centre for International Health, Faculty of Medicine, University of Bergen, Bergen,  
15 Norway, e-mail: [tor.strand@uib.no](mailto:tor.strand@uib.no)

16  
17  
18  
19  
20  
21  
22  
23  
24  
25  
26  
27  
28  
29  
30  
31  
32  
33  
34  
35  
36  
37  
38  
39  
40  
41  
42  
43  
44  
45  
46  
47 Word count excluding title page, abstract, references, figures and tables: 3465 words  
48  
49  
50  
51  
52  
53  
54  
55  
56  
57  
58  
59  
60

## ABSTRACT

### Introduction

As many as 250 million children under the age of five may not be reaching their full developmental potential partly due to poor nutrition during pregnancy and the first 2 years of life. Micronutrients, including vitamin B12, are important for the development of brain structure and function; however, the timing, duration, and severity of deficiencies may alter the impact on functional development outcomes. Consequently, to fully explore the effect of vitamin B12 on cognitive function it is crucial to measure neurodevelopment at different ages, in different populations and with vitamin B12 supplementation at different times during the critical periods of neurodevelopment.

### Methods and analysis

In this project we follow-up children from four recently completed randomized-placebo controlled trials of oral vitamin B12 supplementation, two in India and two in Tanzania, to explore the long-term effects on neurodevelopmental outcomes and growth. All the included trials provided at least two recommended dietary allowances (RDA) of oral vitamin B12 daily for at least six months. Vitamin B12 was supplemented either during pregnancy, early infancy or early childhood. Primary outcomes are neurodevelopmental status, cognitive function and growth later in childhood. We apply validated and culturally appropriate instruments to identify relevant developmental outcomes. All statistical analyses will be done according to intention to treat principles. The project provides an excellent opportunity to examine the effect of vitamin B12 supplementation in different periods during early life and measure the outcomes later in childhood.

### Ethics and dissemination

The study has received ethical approvals from all relevant authorities in Norway, USA, Tanzania and India and complies fully with ethical principles for medical research. Results will be presented at national and international research and policy meetings, and published in peer-reviewed scientific journals, preferably open access.

**Registration** Original trials are registered. There are no new exposures in the follow-up study.

Original trial registrations are NCT00641862 (Bangalore), NCT00717730, updated CTRI/2016/11/007494 (Delhi), and NCT00197548 and NCT00421668 (Dar es Salaam).

### Key words

Vitamin B12; neurodevelopment; cognitive function; event related potential; executive function, growth

## STRENGTHS AND LIMITATIONS OF THE STUDY

- The current project takes advantage of recently completed randomized-placebo controlled trials to study long-term effects of oral vitamin B12 supplementation on neurodevelopmental outcomes and growth in children in Tanzania and India.
- The project provides an excellent opportunity to examine the effect of vitamin B12 supplementation during different periods of the critical first 1000 days and measure the outcomes later in childhood.
- The studies were not designed to follow the children up beyond the time of supplementation, which may lead to a somewhat high rate of loss to follow-up.
- The effect measures may be difficult to standardize across the different studies.

## INTRODUCTION

New estimates based on proxy measures of stunting and poverty indicates that as many as 250 million children under the age of five from developing countries are at risk of not fulfilling their developmental potential partly because of poor nutrition during pregnancy and the first 2 years of life.(1) Malnutrition and micronutrient deficiencies represent a major challenge to child health in many low- and middle-income countries (LMICs) and are associated with suboptimal cognitive function and poor growth.(2) Many children in South Asia and Africa suffer from deficiencies of several nutrients including vitamin B12.(3-7)

### **Vitamin B12 and neurodevelopment**

There is ample evidence that vitamin B12 is important for cognitive development.(8) In observational studies among adults and elderly, low levels of vitamin B12 are associated with cognitive decline and dementia.(9) Although there are fewer observational studies in children, the association between vitamin B12 status and cognitive functioning has also been documented from early infancy to adolescence. Neonatal severe vitamin B12 deficiency causes failure to thrive and possible irreversible neurological manifestations.(10, 11) A study in the Netherlands showed that infants fed on a macrobiotic diet had delayed gross motor, speech and language development compared to infants on an omnivore diet.(12) In adolescence, these same children who were fed a macrobiotic diet for the six first years of life had poorer performance on cognitive tests, independent of their current

1  
2  
3 vitamin B12 status, compared to adolescents who were fed on an omnivorous diet.(13) In an Indian  
4 infant cohort, we also demonstrated that poor vitamin B12 status was associated with lower scores  
5 on the Mental Development Index in the Bayley Scales of Infant and Toddler Development 2<sup>nd</sup>  
6 edition.(4) In a study from Nepal, we were able to demonstrate associations between early vitamin  
7 B12 status (2-12 months) and cognitive functioning five years later.(14) These long-term associations  
8 remained strong, even after adjusting for several potential confounders. There is also evidence for  
9 the significance of vitamin B12 to the developing brain in a few clinical trials. In a RCT where Indian  
10 children aged 6-30 months were administered placebo, vitamin B12 and/or folic acid for six months,  
11 children provided with vitamin B12 and folic acid scored higher on a neurodevelopment assessment  
12 compared to the placebo group.(15) The effects were most prominent in stunted children or children  
13 less than 2 years of age. A favorable effect of vitamin B12 was also demonstrated on motor  
14 development in two RCT's involving Norwegian infants with developmental regressions and signs of  
15 vitamin B12 deficiency one and six months following a 400 µg injection of vitamin B12.(16, 17)  
16  
17  
18  
19  
20  
21  
22  
23

### 24 **Why vitamin B12 may be important for the developing brain**

25  
26 Vitamin B12 plays a key role in normal brain development and function and is required for the folate-  
27 dependent enzyme, methionine synthase, which is necessary for the synthesis of methionine from  
28 homocysteine (tHcy).(18) Methionine in its activated form, S-adenosylmethionine, is the major  
29 methyl group donor used in human methylation reactions, including methylation of DNA and RNA.  
30 Deficient methylation reactions in the central nervous system can impair the methylation of myelin  
31 basic protein in the central as well as peripheral nervous system.(19) The production of myelin is a  
32 key component of brain development from gestation, throughout childhood and well into middle  
33 age.(20) The myelination of the brain is of importance for multiple brain systems and is highly related  
34 to neurodevelopment and subsequent cognitive functioning.(8) Vitamin B12 also serves as a cofactor  
35 in numerous catalytic reactions in the human body, which are required for neurotransmitter  
36 synthesis and functioning. Vitamin B12 deficiency may cause pernicious anemia with similar effects  
37 on cognitive development and functioning as anemia caused by iron deficiency.(11) Vitamin B12  
38 deficiency can also result in neuropathy through degeneration of nerve fibers and irreversible brain  
39 damage.(21) However, albeit subtle vitamin B12 deficiency is very common, the degree to which it  
40 has significant consequences for neurodevelopment and cognitive function is not established.(22, 23)  
41  
42  
43  
44  
45  
46  
47  
48  
49  
50

### 51 **Knowledge gaps**

52  
53 There is a need to clarify to what extent improving vitamin B12 status impacts developmental  
54 outcomes in children in LMICs. It is also important to identify populations in which such interventions  
55 can be beneficial and at what age vitamin B12 administration is most effective.(8) Most studies in  
56  
57  
58  
59  
60



1  
2  
3 this field have used only motor function tests or general neurodevelopment assessments (15, 16, 24),  
4 while less is known on the effect of B12 on specific cognitive functions such as executive functions,  
5 attention, and sensorimotor and visuospatial abilities.(14) The functions and areas under  
6 development are most sensitive to negative influences, and will provide the most specific outcomes  
7 in assessments.(25, 26) Consequently, to fully understand findings in developmental assessments, we  
8 must consider the developmental timing of an exposure, in this case vitamin B12 supplementation  
9 (or lack thereof), as well as the timing of the assessment.(25) Measuring neurodevelopment at  
10 different ages, in different populations and the effect of exposure at different times during the  
11 critical periods of neurodevelopment is needed to understand the role of B12 in cognition.  
12  
13  
14  
15  
16  
17

18 Research on the impact of B12 on the neurophysiological outcomes in children is scarce. Event  
19 Related Potential (ERP) are non-invasive, reliable measures of neurophysiological brain function(27),  
20 that provide direct measure of underlying neural activity of higher mental processes. Behavioral  
21 assessments may sometimes not be sensitive enough to detect these small changes in brain  
22 functions(28) and these neurophysiological processes may be important correlates of the cognitive  
23 abilities and give new insight into the nutritional impact on the developing brain.(29)  
24  
25  
26  
27  
28  
29  
30

### 31 **STUDY OBJECTIVES**

32 The aim of the current study, the Vitabeginning project, is to determine the long-term effects of  
33 vitamin B12 supplementation given during the first 1000 days of life on neurodevelopmental  
34 outcomes and growth.  
35  
36  
37  
38

#### 39 **General objective**

- 40 ● To provide evidence for the role of vitamin B12 on neurodevelopment in vulnerable children  
41 in low and-middle income countries (LMICs).  
42  
43  
44

#### 45 *Specific objectives and objectives of the separate studies*

- 46 ● In North Indian children 6 to 30 months at enrollment, measure to what extent six months'  
47 administration of vitamin B12 with or without folic acid improves neurodevelopment and  
48 cognitive function five years after the end of supplementation.  
49
- 50 ● In South Indian children, measure to what extent administration of vitamin B12 in pregnancy  
51 and early lactation improves neurodevelopment, cognition and neurophysiological function in  
52 childhood.  
53
- 54 ● In Tanzanian children, measure to what extent administration of vitamin B12 given with other  
55  
56  
57  
58  
59  
60

1  
2  
3 vitamins from early or mid-pregnancy until delivery improves neurodevelopment and cognitive  
4 function up to school age.

- 5  
6 ● In Tanzanian children, measure to what extent administration of vitamin B12 given with other  
7 vitamins from week 6 to 18 months improves neurodevelopment and cognitive function up to  
8 school age.
- 9  
10 ● To estimate the effect of vitamin B12 administration on certain domains of neurodevelopment  
11 using pooled data from all of the above studies.  
12  
13

## 14 15 **METHODS AND ANALYSIS**

### 16 17 **Study design and interventions**

18 This study is a follow-up of four recently completed double blind randomized-placebo controlled  
19 trials conducted in lower socioeconomic, semi-urban and urban populations in Delhi, India(15, 30),  
20 Bangalore, India(31) and in Dar es Salaam, Tanzania(32, 33) in 2001 to 2011. All trials provided at  
21 least two recommended dietary allowances (RDA) of vitamin B12 daily for at least six months, with  
22 no B12 supplementation in the placebo groups. The two studies that enrolled pregnant women  
23 provided the highest dose of vitamin B12 (50µg daily, approximately 20 times the RDA). An overview  
24 of the original trials and the follow-ups is presented in Table 1.  
25  
26  
27  
28  
29  
30

31 In Bangalore, South-India, pregnant women before or at 14 weeks gestational age were randomized  
32 to receive a daily dose of oral B12 (50 µg) or a placebo through 6 weeks post-partum. The primary  
33 objective was to determine the effect of vitamin B12 supplementation in improving maternal B12  
34 status. Enrollment was completed in September 2010, and the last enrolled infant was born in  
35 August 2011. Oral B12 supplementation of women throughout pregnancy and early lactation, in  
36 combination with standard prenatal care with routine supplementation of iron and folate,  
37 significantly increased the B12 status of women and their offspring.(31) Neurodevelopment was  
38 measured at 9 and 30 months. In this follow-up study, we will measure the effect of maternal B12  
39 supplementation on neurodevelopment and cognitive function several times 5-7 years after  
40 supplementation, and on neurophysiological outcomes using event-related potential (ERP).  
41  
42  
43  
44  
45  
46  
47  
48  
49  
50  
51  
52  
53  
54  
55  
56  
57  
58  
59  
60

1  
2  
3  
4  
5  
6  
7  
8  
9  
10  
11  
12  
13  
14  
15  
16  
17  
18  
19  
20  
21  
22  
23  
24  
25  
26  
27  
28  
29  
30  
31  
32  
33  
34  
35  
36  
37  
38  
39  
40  
41  
42  
43  
44  
45  
46  
47

Table. 1 Overview of study populations, study period and exposure in the original trials and in the Vitabeginning follow-up study

| Characteristics                    | Bangalore         | Delhi                              | Dares Salaam             |                             |
|------------------------------------|-------------------|------------------------------------|--------------------------|-----------------------------|
| <b>ORIGINAL TRIALS</b>             |                   |                                    |                          |                             |
| Trial registration number          | NCT00641862       | NCT00717730                        | NCT00197548              | NCT00421668                 |
| Intervention period                | 09.2010-08.2011   | 01.2010-03.2011                    | 08.2001- 02.2005         | 07.2007- 05. 2011           |
| Original sample size               | 366               | 1000                               | 8468                     | 2400                        |
| Exposure                           | B12 <sup>a</sup>  | B12 and/or folic acid <sup>b</sup> | Maternal MV <sup>c</sup> | MV and/or zinc <sup>d</sup> |
| Timing of exposure                 | Pregnancy         | Infancy/early childhood            | Pregnancy                | Infancy                     |
| <b>VITABEGINNING FOLLOW-UPS</b>    |                   |                                    |                          |                             |
| Expected sample size               | 230               | 800-900                            | 366                      | 446                         |
| Age range at follow-up             | 5-6.5 yrs         | 7-9 yrs                            | 11-15 yrs                | 7-10 yrs                    |
| Start date of enrollment           | 01.2015           | 10.2016                            | 07.2015                  | 07.2015                     |
| Expected date for study completion | Estimated 07.2017 | Estimated 11.2017                  | Estimated 11.2017        | Estimated 11.2017           |

<sup>a</sup> From < 14 wk gestational age to 6 wk post-partum B12 50 µg daily. In addition, all women were given iron and folic acid supplementation throughout pregnancy

<sup>b</sup> From 6-30 months for 6 months; four group: B12, B12 + folic acid, folic acid and placebo, doses >12 months: B12 1.8 µg and Folic acid 150 µg (half doses for <12 months).

<sup>c</sup> From 12-27 wk gestational age until delivery: Multivitamin (MV) B12 50 µg, B1 20mg, B2 20mg, B6 25 mg, Niacin 100mg, Vit-C 500 mg, Vit-E 30 mg, Folic acid 0.8 mg

<sup>d</sup> From 6 wk to 18 months, four groups; multivitamin (MV), MV + Zinc, Z and placebo. MV<6m: B12 1mg, B1 0.5mg, B2 0.6mg, B6 0.6mg, niacin 4mg, folic acid 130µg, Vit-C 60mg, Vit-E 8mg. Zinc5 mg. > 6 m MV and zinc doses were double

1  
2  
3  
4 In Delhi, North India, children 6-30 months of age were randomized to receive daily (i) B12, (ii) B12  
5 and folate, (iii) folate, or (iv) placebo for six months. The primary objective was to measure the effect  
6 of these interventions on the incidence of diarrhea and pneumonia. Neurodevelopment was a  
7 predefined secondary outcome and was measured in a sub-sample of 422 children. In total 1000  
8 children were enrolled between January 2010 and September 2011. B12 and folic acid supplemented  
9 children scored significantly higher on neurodevelopment scores compared to those who received  
10 placebo.(15) In this follow-up study we will measure to what extent early supplementation of folic  
11 acid and/or B12 improves neurodevelopment and cognitive function 5-6 years after  
12 supplementation.  
13  
14  
15  
16  
17  
18

19 In Dar es Salaam, Tanzania, infants 6-10 weeks of age born to HIV-negative mothers were  
20 randomized to receive daily (i) zinc, (ii) multivitamin, (iii) zinc +multivitamin, or (iv) placebo.  
21 Multivitamins contained on average two times the recommended daily allowance of B-vitamins,  
22 including B12 in addition to vitamin E and C. Children were followed for 18 months (i.e. until age 19.5  
23 months). The primary objective was to measure the incidence of diarrhea and respiratory tract  
24 infections. Enrollment was completed in December 2009, and follow-up ended in May 2011.  
25 Neurodevelopmental outcomes were assessed in a subset of children at 15 months.(32) Daily zinc  
26 supplementation lowered the burden of diarrhea and respiratory tract infections. No added benefit  
27 was seen from the provision of multivitamins.(33)  
28  
29  
30  
31  
32  
33  
34

35 In another trial in Dar es Salaam, Tanzania on micronutrients and adverse pregnancy outcomes, HIV-  
36 negative pregnant women at 12-27 weeks gestational age were randomized to receive daily oral  
37 supplementation of B-vitamins, including B12 in addition to vitamin E and C, or placebo. All women  
38 received prenatal iron and folate supplementation. The primary objective was to measure the effect  
39 of vitamin supplementation on fetal loss, low birthweight and severe preterm birth. Enrollment was  
40 completed in July 2004, and the last enrolled infant was born in February 2005. Multivitamin  
41 supplementation reduced the incidence of low birth weight and small for-gestational-age births, but  
42 had no significant effects on prematurity or fetal death.(34) The two studies from Tanzania are well  
43 suited for follow-up studies on potential impact of micronutrient supplementation on child health  
44 and neurodevelopmental outcomes in older children.  
45  
46  
47  
48  
49  
50  
51

## 52 **Outcomes**

53 Neurodevelopment, cognitive function, and linear growth will be key outcomes in the different  
54 studies.  
55  
56  
57  
58  
59  
60

### *Neurodevelopment*

Neurodevelopmental status in young children has been assessed by the Bayley Scales of Infant and Toddler Development 3rd ed. (Bayley- III)(35) and the Ages and Stages Questionnaire 3rd ed. (ASQ-3) in the original studies.(15, 36) In the follow-up, each site use their own unique collections of tests and questionnaires (Table 2). General cognitive functioning is assessed by a modified Kaufmann ABC II (Bangalore and Dar es Salaam), the Wechsler Preschool and Primary Scale of Intelligence –III (WPPSI III) (Bangalore) or the Wechsler Intelligence Scale for Children VI, Indian version (WISC-IV<sup>India</sup>) (Delhi). These are complemented by tests on specific cognitive functions by subtests from the developmental neuropsychological test battery NEPSY-II (Delhi), and social maturity such as the Vineland Social Maturity Scale (VSMS) (Bangalore), mental health and behavior such as the Strengths and Difficulties Questionnaire (SDQ) and executive functions by Behavior Rating Inventory of Executive Function (BRIEF (all sites). In addition, in one study (Bangalore) we study the effect of the maternal B12 supplementation on Event Related Potential (ERP) in children aged 6 years. See table 2 for details on the assessments at each site.

### *Anthropometry*

Weight and height are measured using standard methods. In Delhi, height, weight and skin fold thickness were measured in children, using Seca scales (height/weight) and Holtain Calipers. In Bangalore weights of mothers and children were recorded using a digital balance (Salter's 9016; Tonbridge) to the nearest 100g, and the heights were measured using a stadiometer to the nearest 0.1 cm.

Table 2. Overview over inventories and data-collection tools utilized in the different studies and the age of assessment

| Outcomes to be measured                        | Bangalore      | Delhi    | Dares Salaam |          |
|------------------------------------------------|----------------|----------|--------------|----------|
| Vitamin B12 exposure                           | Pregnancy      | Child    | Pregnancy    | Child    |
| Outcomes to be measured                        | Age, yrs       | Age, yrs | Age, yrs     | Age, yrs |
| <b>General abilities</b>                       |                |          |              |          |
| Modified KABC-II <sup>a</sup> EACABT®          | 5, 6           |          | 11-15        | 7-10     |
| WISC-IV <sup>INDIA</sup>                       |                | 7-9      |              |          |
| <b>Verbal abilities</b>                        |                |          |              |          |
| Crichton Vocabulary Scale, Hindi edition       |                | 7-9      |              |          |
| <b>Neurophysiological tests</b>                |                |          |              |          |
| Event related potential <sup>b</sup>           | 6              |          |              |          |
| <b>Neuropsychological tests</b>                |                |          |              |          |
| NEPSY II                                       |                | 7-9      |              |          |
| <b>Questionnaires</b>                          |                |          |              |          |
| Brief <sup>c</sup>                             | 5.5            | 7-9      | 11-15        | 7-10     |
| Strengths and Difficulties Questionnaire (SDQ) | 6.5            | 7-9      | 11-15        | 7-10     |
| Vineland Social Maturity Scale (VSMS)          | 5              |          |              |          |
| <b>Maternal assessment</b>                     |                |          |              |          |
| Demography                                     | 5              | 7-9      | 11-15        | 7-10     |
| Anthropometry                                  | 5, 5.5, 6, 6.5 |          | 11-15        | 7-10     |
| Home environment                               | 5.5            |          | 11-15        | 7-10     |
| <b>Nutrition</b>                               |                |          |              |          |
| 24 hour diet recall form                       | 5, 5.5, 6, 6.5 |          |              |          |
| Anthropometry                                  | 5, 5.5, 6, 6.5 | 7-9      | 11-15        | 7-10     |
| Household food security questionnaire          | 5, 6           |          |              |          |
| <b>Medical morbidity</b>                       |                |          |              |          |
| Morbidity questionnaire                        | 5, 5.5, 6, 6.5 |          | 11-15        | 7-10     |
| <b>Biomarkers</b>                              |                |          |              |          |
| B12                                            | 5, 6           | 7-9      |              | 6-24m *  |
| CBC, MMA, HcY, RBC folate, CRP                 | 5, 6           | 7-9      |              |          |
| H                                              | 5, 6           | 7-9      | 11-15        | 7-10     |

<sup>a</sup> In Bangalore: Atlantis, Number recall, Word Order, Pattern Reasoning and Triangles from KABC and Koh's Block Design Test and Verbal Fluency in addition, in Dar es Salaam: The East African Cognitive Assessment battery (EACABT®) with permission from Savings Brain Multisite study (WHO/BMGF) including Atlantis, Hand Movements, Footsteps, Story completion, KILIFI Naming test, ROCF, NOGO, Shift, People Search, Literacy and Numeracy, HOME, Brief-P (modified from MAL-ED), SDQ, Behavior Questionnaire for Parents (BQP), in addition to Verbal Fluency and, Koh's Block

<sup>b</sup> ENBIO 32, Brain monitoring and stimulation technologies, mis-match negativity, P300

<sup>c</sup> Different versions utilized in different sites: in Bangalore: Brief Parent, In Delhi: Brief 2<sup>nd</sup> ed., in Dares Salaam: Saving Brains/Gates/WHO modified version from the malaria study,

\* On stored serum samples from Child II cohort (subject to funding)

### Sample size calculation

The data for our most relevant tests are expected to be normally distributed. We have decided that a standardized effect size of 0.35 standard deviations (SD) is the minimally clinically relevant effect for the main psychometric tests. If the smallest group in any of our comparisons includes at least 130

1  
2  
3 children in each arm, and assuming a two-sided alpha error of 0.05 we will have 81%, 89%, and 98%  
4 power to detect differences for effect sizes of 0.35, 0.4, and 0.6, respectively. As a result, all of the  
5 described studies have sufficient power to detect important differences between vitamin B12 and  
6 placebo recipients, between individuals with poor and adequate vitamin B12 status or between other  
7 groups of other exposures as long as each of the groups contain at least 130 children. Statistical  
8 powers according to standardized mean effect sizes of .35, .4 and .6 and total sample sizes are  
9 depicted in figure 1. This graph was generated using the “power twomeans” command in STATA  
10 version 13, it assumes equal group sizes and equal variances, and a significance level of 0.05.  
11  
12  
13  
14  
15

### 16 17 **Data collection**

18 Data-collection for the primary and secondary outcomes are synchronized and selected to capture  
19 the same domains of development using different tools. Assessment tools for cognitive functions  
20 such as general abilities, achievement, verbal-, visual spatial and sensorimotor skills, memory,  
21 executive functioning, general behavior and social perception and maturity are dependent on the  
22 child’s age. We have carefully selected well-validated and developmentally sensitive instruments to  
23 ensure detection of the relevant predictors according to age and research questions. Instruments are  
24 adapted to ensure psychometric qualities, as well as cultural and linguistic appropriateness of the  
25 test at each site. Clinically useful tests will be prioritized, to improve sustainability of test material  
26 and knowledge of developmental assessment at the specific sites. A group of experienced scientists  
27 with expertise in developmental, neuropsychological and neurophysiological assessments are  
28 responsible for training and standardization in the different sites.  
29  
30  
31  
32  
33  
34  
35  
36

### 37 **Analysis plan**

38 Several domains will be measured and compared between the study groups within each of the  
39 studies. In these analyses, we will initially use the Students t-test for the crude analyses, but also  
40 multiple linear regression models to adjust for potential baseline differences and when measuring  
41 effect modification.  
42  
43  
44  
45  
46

47 Each of the studies has several outcomes as we will compare both linear and ponderal growth, in  
48 addition to all the above-mentioned neurodevelopmental measures between the study groups.  
49 Thus, there will be several comparisons from each study and negative and positive effects will be  
50 reported in order to avoid focusing on spurious positive findings.  
51  
52  
53

54 For each of the planned publications, we will make a detailed plan of analysis before commencing  
55 the analysis. In these plans, we will include sections on how to deal with multiple comparisons and  
56  
57  
58

1  
2  
3 whether post hoc adjustments will be done. In addition to these standard per protocol analysis, we  
4 will consider Instrumental Variable Analysis (IVA) in an attempt to estimate the true effect of vitamin  
5 B12 had it been given to all participants in the scheduled doses and intervals. The random allocation  
6 will be the instrument in these analyses. For per protocol analysis, participants who received less  
7 than 50% of the projected doses during the period of intervention will not be included in the  
8 analyses, well acknowledging that the ensuing effect estimates may not only be biased but will  
9 certainly represent an effect higher than what can be achieved even in our well-resourced study  
10 setting.  
11  
12  
13  
14  
15

16  
17 For our subgroup analyses, we will include interaction terms to measure whether or not the  
18 subgrouping variable significantly modifies the effect of the exposure of interest. All of our analyses  
19 will initially be done according to intent to treat.  
20  
21  
22

23 We will not be able to retain the complete number of children from these studies. We will compare  
24 the features of the population that is included in this analysis with the population that we failed to  
25 reenroll into the study. We will also detect risk factors for poor neurodevelopment in multiple linear  
26 or binomial regression models. A significance level of 0.05 will be used.  
27  
28  
29  
30

## 31 ETHICS AND DISSEMINATION

### 32 **Ethical and safety considerations**

33 The exposures under investigation in this study were included in the original trials. We have obtained  
34 ethical approval of all new research activities in this follow-up study, from Norway and from the  
35 participating countries. Informed written parental consent will be taken from one or both parents of  
36 participating children prior to enrollment in the follow-up study and assent will be obtained from  
37 children older than 7 years in the Delhi site. Parents unable to read or write will be encouraged to  
38 bring along a literate relative or neighbor as an impartial witness.  
39  
40  
41  
42  
43  
44

### 45 **Relevance and benefit to society**

46 The current project takes advantage of four recently completed randomized-placebo controlled  
47 trials, to study the long-term effects of vitamin B12 supplementation on neurodevelopmental  
48 outcomes and growth in children in low- and middle-income countries. When measuring the effect  
49 of vitamin B12 on growth and development long term follow-up is important: Vitamin B12 can be  
50 stored for years in the body, and the effect of an increased intake for a relatively short period such as  
51 6 months may accordingly last much longer. Furthermore, for many of the neurodevelopmental  
52 outcomes, it might not be possible to estimate the effect of early life exposures until later in  
53  
54  
55  
56  
57  
58  
59  
60



1  
2  
3 childhood because of limitations in the assessment tools. Thus, to follow children for a long time as in  
4 this project is important to fully understand the role of vitamin B12 for brain development and  
5 growth.  
6  
7

8  
9 In most studies, follow-up for several years is not possible, so the results from our studies will be of  
10 great importance. Since none of the RCTs originally were designed for such long term follow-up,  
11 there is risk that loss to follow-up can bias our effect estimates. There is, however, no reason to  
12 believe that the loss to follow-up rate will be different according to randomized regimen in any of the  
13 described studies.  
14  
15

16  
17  
18 If positive effects of supplementation are observed, this may constitute important contributions to  
19 improve childhood nutrition in many low and middle-income countries. Our findings, however, must  
20 be interpreted in light of the results from other RCTs that are measuring the effect of vitamin B12  
21 supplementation on growth and development. If anything, our findings will guide our next step in  
22 understanding the role of vitamin B12 nutrition on child growth and development: Should there be  
23 additional follow-ups in the ongoing studies, or will the results from our studies discourage further  
24 studies on vitamin B12 and child health?  
25  
26  
27  
28  
29

30  
31 It should also be emphasized the value of negative findings from this large project. If none, or very  
32 few, of our several outcomes respond to vitamin B12 supplementation, alone or when given in  
33 combination with several other micronutrients, then poor vitamin B12 status is likely not an  
34 important contributor to impaired neurodevelopment.  
35  
36  
37

38  
39 Millions of children across the world grow up malnourished lacking essential nutrients, with high  
40 burden of infectious diseases and where parents may not have the resources to provide an optimal  
41 environment for nurturing care. Acting in early childhood, these factors may result in poorer chances  
42 for later success in school and work. The results from the RCTs can lead to dietary recommendations  
43 that can improve learning and academic achievements, which again can lift individuals from the  
44 vicious cycle of poverty and malnutrition. Programs designed to prevent or treat micronutrient  
45 deficiencies can be targeted toward specific recommendations. Any further evidence for the long-  
46 term effect of dietary supplements has potentially high impact and may provide sustainable  
47 improvements in health and equity.  
48  
49  
50  
51  
52

53  
54 The suggested studies are geared towards rapid dissemination of results into national and  
55 international child health promotion programs. We will actively use the potential influence of the  
56  
57  
58

1  
2  
3 international collaborators to ensure that our results reach the relevant health authorities.  
4  
5

### 6 **Planned publications**

7 Study results will be presented at national and international research and policy meetings, and  
8 published in peer-reviewed scientific journals, preferably open access. We will also discuss  
9 alternative strategies to inform the public. We will publish scientific papers as a consortium,  
10 specifically directed towards developmental and neuropsychological assessment methodology, and  
11 site specific publications. We expect each of the sites to generate approximately five publications in  
12 high ranked international peer reviewed journals.  
13  
14  
15  
16  
17

### 18 **AUTHOR'S CONTRIBUTIONS**

19 TAS, IK, CPD, and WF took the initial initiative for the study. TAS, IK, CPD, WF, BAW, SK, KM, ST, MH,  
20 NB and ES, were involved in developing the design and the study protocol, ST, SK and KM are  
21 responsible for setting up the study conduct in each site, with support from AD, ST and SB. The  
22 statistical approach of the study was drafted by CS, MH, TAS, and WFMH, IK, ES, DCB, and SK were  
23 responsible for the cognitive assessments included in the protocol. All authors approved the final  
24 version of the protocol. BAW, IK and TAS drafted the current manuscript. All authors have reviewed  
25 and accepted the final version of the manuscript.  
26  
27  
28  
29  
30  
31  
32

### 33 **FUNDING STATEMENT**

34 The Vitabeginning study was funded by the Norwegian Research Council Grant number 234495.  
35  
36  
37

### 38 **Funding of the original trials**

39 The original trial in Bangalore was funded by the Indian Council of Medical Research grant  
40 5/7/192/06-RHN and Eunice Kennedy Shriver National Institute of Child Health and Human  
41 Development grants R03 HD054123. The study in Delhi was funded by the Thrasher Research Fund  
42 (grant 02827), and the Research Council of Norway (project 172226). The trials in Tanzania were  
43 funded by National Institute of Child Health and Human Development (NICHD R01 37701)  
44 (pregnancy) and the Eunice Kennedy Shriver National Institute of Health grant R01 HD048969-01  
45 (child). CPD is supported by NIH grants K24DK104676.  
46  
47  
48  
49  
50  
51  
52

### 53 **COMPETING INTERESTS STATEMENT**

54 None declared  
55  
56  
57  
58  
59  
60

## FIGURE LEGENDS

Figure 1. Estimated required total sample sizes based on relevant effect sizes

## REFERENCES

1. Black MM, Walker SP, Fernald LCH et al., Early childhood development coming of age: science through the life course. *Lancet*. 2017;389(10064):77-90.
2. Black MM. Micronutrient deficiencies and cognitive functioning. *J Nutr*. 2003;133(11 Suppl 2):3927S-31S.
3. Bhan MK, Sommerfelt H, Strand T. Micronutrient deficiency in children. *Br J Nutr*. 2001;85 Suppl 2:S199-203.
4. Taneja S, Bhandari N, Strand TA et al., Cobalamin and folate status in infants and young children in a low-to-middle income community in India. *Am J Clin Nutr*. 2007;86(5):1302-9.
5. Allen LH. How common is vitamin B-12 deficiency? *Am J Clin Nutr*. 2009;89(2):693S-6S.
6. Ulak M, Chandyo RK, Adhikari RK et al., Cobalamin and folate status in 6 to 35 months old children presenting with acute diarrhea in Bhaktapur, Nepal. *PLoS One*. 2014;9(3):e90079.
7. Ulak M, Chandyo RK, Thorne-Lyman AL et al., Vitamin Status among Breastfed Infants in Bhaktapur, Nepal. *Nutrients*. 2016;8(3):149.
8. Black MM. Effects of vitamin B12 and folate deficiency on brain development in children. *Food Nutr Bull*. 2008;29(2 Suppl):S126-S31.
9. Selhub J, Morris MS, Jacques PF et al., Folate-vitamin B-12 interaction in relation to cognitive impairment, anemia, and biochemical indicators of vitamin B-12 deficiency. *Am J Clin Nutr*. 2009;89(2):702S-6S.
10. Bjorke Monsen AL, Ueland PM. Homocysteine and methylmalonic acid in diagnosis and risk assessment from infancy to adolescence. *Am J Clin Nutr*. 2003;78(1):7-21.
11. Dror DK, Allen LH. Effect of vitamin B12 deficiency on neurodevelopment in infants: current knowledge and possible mechanisms. *Nutr Rev*. 2008;66(5):250-5.
12. Schneede J, Dagnelie PC, van Staveren WA et al., Methylmalonic acid and homocysteine in plasma as indicators of functional cobalamin deficiency in infants on macrobiotic diets. *Pediatr Res*. 1994;36(2):194-201.
13. Louwman MW, van DM, van de Vijver FJ et al., Signs of impaired cognitive function in adolescents with marginal cobalamin status. *Am J Clin Nutr*. 2000;72(3):762-9.
14. Kvestad I, Hysing M, Shrestha M et al., Vitamin B-12 status in infancy is positively associated with development and cognitive functioning 5 y later in Nepalese children. *Am J Clin Nutr*. 2017;105(5):1122-31.
15. Kvestad I, Taneja S, Kumar T et al., Vitamin B12 and Folic Acid Improve Gross Motor and Problem-Solving Skills in Young North Indian Children: A Randomized Placebo-Controlled Trial. *PLoS One*. 2015;10(6):e0129915.
16. Torsvik I, Ueland PM, Markestad T et al., Cobalamin supplementation improves motor development and regurgitations in infants: results from a randomized intervention study. *Am J Clin Nutr*. 2013;98(5):1233-40.
17. Torsvik IK, Ueland PM, Markestad T et al., Motor development related to duration of exclusive breastfeeding, B vitamin status and B12 supplementation in infants with a birth weight between 2000-3000 g, results from a randomized intervention trial. *BMC Pediatr*. 2015;15:218.
18. Ueland PM, Monsen AL. Hyperhomocysteinemia and B-vitamin deficiencies in infants and children. *Clin Chem Lab Med*. 2003;41(11):1418-26.
19. Weir DG, Scott JM. Brain function in the elderly: role of vitamin B12 and folate. *Br Med Bull*.

- 1999;55(3):669-82.
20. Stiles J, Jernigan TL. The basics of brain development. *Neuropsychol Rev*. 2010;20(4):327-48.
21. Calvaresi E, Bryan J. B vitamins, cognition, and aging: a review. *J Gerontol B Psychol Sci Soc Sci*. 2001;56(6):P327-39.
22. van de Rest O, van Hooijdonk LW, Doets E et al., B vitamins and n-3 fatty acids for brain development and function: review of human studies. *AnnNutrMetab*. 2012;60(4):272-92.
23. Finkelstein JL, Layden AJ, Stover PJ. Vitamin B-12 and Perinatal Health. *Adv Nutr*. 2015;6(5):552-63.
24. Strand TA, Taneja S, Ueland PM et al., Cobalamin and folate status predicts mental development scores in North Indian children 12-18 mo of age. *Am J Clin Nutr*. 2013;97(2):310-7.
25. Walder D, JC S, Pulsifer M. Neurodevelopmental Assessment. *Evidence-Based Practice in Infant and Early childhood Psychology* 2009 2009.
26. Thompson RA, Nelson CA. Developmental science and the media. Early brain development. *AmPsychol*. 2001;56(1):5-15.
27. Light GA, Willians, L.E, Minow, F et al., Electroencephalography (EEG) and Event-Related Potentials (ERPs) with Human Participants. *Current Protocols in Neuroscience*. 2010;6.25.1-6.25.24.
28. Uauy R, Peirano P. Breast is best: human milk is the optimal food for brain development. *Am J Clin Nutr*. 1999;70(4):433-4.
29. deRegnier RA, Long JD, Georgieff MK et al., Using event-related potentials to study perinatal nutrition and brain development in infants of diabetic mothers. *Dev Neuropsychol*. 2007;31(3):379-96.
30. Taneja S, Strand TA, Kumar T et al., Folic acid and vitamin B-12 supplementation and common infections in 6-30-mo-old children in India: a randomized placebo-controlled trial. *AmJClinNutr*. 2013.
31. Duggan C, Srinivasan K, Thomas T et al., Vitamin B-12 supplementation during pregnancy and early lactation increases maternal, breast milk, and infant measures of vitamin B-12 status. *J Nutr*. 2014;144(5):758-64.
32. Locks LM, Manji KP, McDonald CM et al., The effect of daily zinc and/or multivitamin supplements on early childhood development in Tanzania: results from a randomized controlled trial. *Matern Child Nutr*. 2017;13(2).
33. McDonald CM, Manji KP, Kisenge R et al., Daily Zinc but Not Multivitamin Supplementation Reduces Diarrhea and Upper Respiratory Infections in Tanzanian Infants: A Randomized, Double-Blind, Placebo-Controlled Clinical Trial. *J Nutr*. 2015;145(9):2153-60.
34. Fawzi WW, Msamanga GI, Urassa W et al., Vitamins and perinatal outcomes among HIV-negative women in Tanzania. *N Engl J Med*. 2007;356(14):1423-31.
35. Srinivasan K, Thomas T, Kapanee AR et al., Effects of maternal vitamin B12 supplementation on early infant neurocognitive outcomes: a randomized controlled clinical trial. *Matern Child Nutr*. 2017;13(2).
36. Kvestad I, Taneja S, Kumar T et al., The assessment of developmental status using the Ages and Stages questionnaire-3 in nutritional research in north Indian young children. *NutrJ*. 2013;12:50.

1  
2  
3  
4  
5  
6  
7  
8  
9  
10  
11  
12  
13  
14  
15  
16  
17  
18  
19  
20  
21  
22  
23  
24  
25  
26  
27  
28  
29  
30  
31  
32  
33  
34  
35  
36  
37  
38  
39  
40  
41  
42  
43  
44  
45  
46  
47  
48  
49  
50  
51  
52  
53  
54  
55  
56  
57  
58  
59  
60

For peer review only

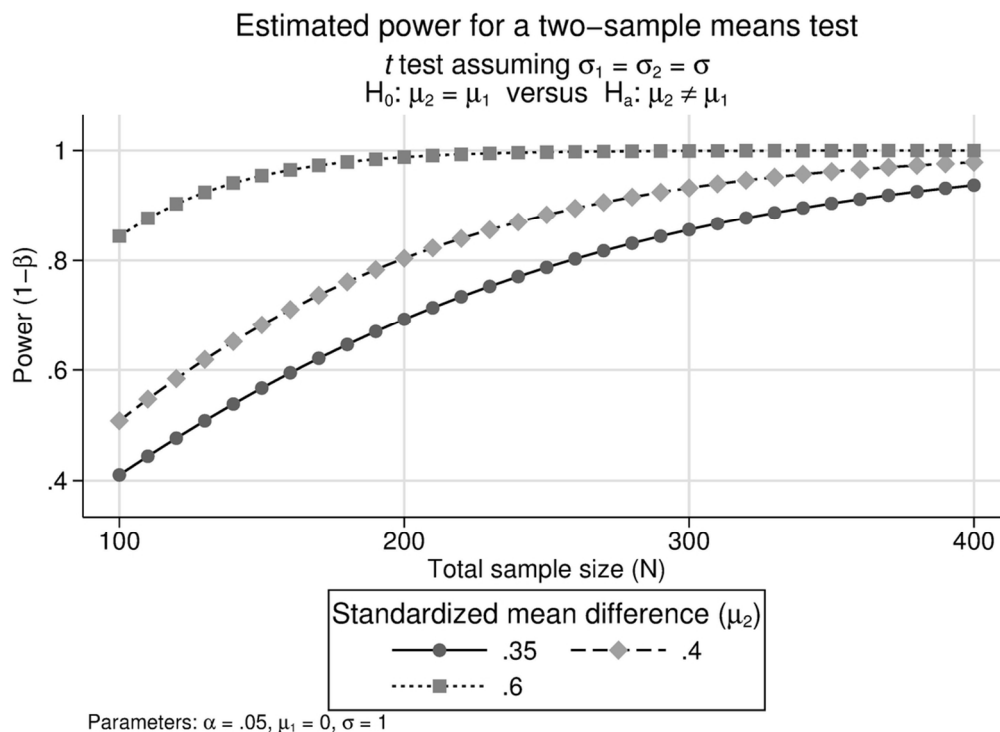

101x73mm (300 x 300 DPI)

Peer Review Only

# BMJ Open

## Does early vitamin B12 supplementation improve neurodevelopment and cognitive function in childhood and into school age; a study protocol for extended follow-ups from randomized controlled trials in India and Tanzania

|                                 |                                                                                                                                                                                                                                                                                                                                                                                                                                                                                                                                                                                                                                                                                                                                                                                                                                                                                                                                                                                                                                                                                                                                                                                                                                                                                                                                                                                                                                                                                                                                                                                                                                                                                                                                                                                                            |
|---------------------------------|------------------------------------------------------------------------------------------------------------------------------------------------------------------------------------------------------------------------------------------------------------------------------------------------------------------------------------------------------------------------------------------------------------------------------------------------------------------------------------------------------------------------------------------------------------------------------------------------------------------------------------------------------------------------------------------------------------------------------------------------------------------------------------------------------------------------------------------------------------------------------------------------------------------------------------------------------------------------------------------------------------------------------------------------------------------------------------------------------------------------------------------------------------------------------------------------------------------------------------------------------------------------------------------------------------------------------------------------------------------------------------------------------------------------------------------------------------------------------------------------------------------------------------------------------------------------------------------------------------------------------------------------------------------------------------------------------------------------------------------------------------------------------------------------------------|
| Journal:                        | <i>BMJ Open</i>                                                                                                                                                                                                                                                                                                                                                                                                                                                                                                                                                                                                                                                                                                                                                                                                                                                                                                                                                                                                                                                                                                                                                                                                                                                                                                                                                                                                                                                                                                                                                                                                                                                                                                                                                                                            |
| Manuscript ID                   | bmjopen-2017-018962.R1                                                                                                                                                                                                                                                                                                                                                                                                                                                                                                                                                                                                                                                                                                                                                                                                                                                                                                                                                                                                                                                                                                                                                                                                                                                                                                                                                                                                                                                                                                                                                                                                                                                                                                                                                                                     |
| Article Type:                   | Protocol                                                                                                                                                                                                                                                                                                                                                                                                                                                                                                                                                                                                                                                                                                                                                                                                                                                                                                                                                                                                                                                                                                                                                                                                                                                                                                                                                                                                                                                                                                                                                                                                                                                                                                                                                                                                   |
| Date Submitted by the Author:   | 07-Nov-2017                                                                                                                                                                                                                                                                                                                                                                                                                                                                                                                                                                                                                                                                                                                                                                                                                                                                                                                                                                                                                                                                                                                                                                                                                                                                                                                                                                                                                                                                                                                                                                                                                                                                                                                                                                                                |
| Complete List of Authors:       | <p>Winje, Brita; Norwegian Institute of Public Health, Department of vaccine preventable diseases<br/> Kvestad, Ingrid; Uni Health, Uni Research, Regional Centre for Child and Youth Mental Health and Child Welfare<br/> Krishnamachari, Srinivasan ; St. John's Research Institute, Division of Mental Health &amp; Neurosciences<br/> Manji, Karim; Muhibili University of Health and Allied Sciences, Department of Pediatrics and Child Health<br/> Taneja, Sunita; Centre for Health Research and Development, Society for Applied Studies<br/> Bellinger, David; Children's Hospital Boston<br/> Bhandari, Nita; Society for applied studies, Centre for Health Research and Development<br/> Bisht, Shruti; Centre for Health Research and Development, Society for Applied Studies<br/> Darling, Anne Marie; Harvard T.H. Chan School of Public Health, Department of Global Health and Population<br/> Duggan, Christopher; Children's Hospital Boston<br/> Fawzi, Wafaie.; Harvard T.H. Chan School of Public Health, Department of Global Health and Population<br/> Hysing, Mari; Uni Health, Uni Research, Regional Centre for Child and Youth Mental Health and Child Welfare<br/> Kumar, Tivendra; Society for applied studies, Centre for Health Research and Development<br/> Kurpad, Anura; St. John's Research Institute, Division of Nutrition<br/> Sudfeld, CR; Harvard University T H Chan School of Public Health, Departments of Global Health and Population<br/> Svensen, Erling; Haukeland University Hospital, Helse Bergen<br/> Thomas, Susan; St. John's Research Institute, Division of Mental Health and Neurosciences<br/> Strand, TA; Innlandet Hospital Trust, Department of Research; University of Bergen, Faculty of Medicine, Centre for International Health</p> |
| <b>Primary Subject Heading</b>: | Nutrition and metabolism                                                                                                                                                                                                                                                                                                                                                                                                                                                                                                                                                                                                                                                                                                                                                                                                                                                                                                                                                                                                                                                                                                                                                                                                                                                                                                                                                                                                                                                                                                                                                                                                                                                                                                                                                                                   |
| Secondary Subject Heading:      | Neurology, Public health, Global health                                                                                                                                                                                                                                                                                                                                                                                                                                                                                                                                                                                                                                                                                                                                                                                                                                                                                                                                                                                                                                                                                                                                                                                                                                                                                                                                                                                                                                                                                                                                                                                                                                                                                                                                                                    |
| Keywords:                       | Vitamin B12, neurodevelopment, cognitive function, event related                                                                                                                                                                                                                                                                                                                                                                                                                                                                                                                                                                                                                                                                                                                                                                                                                                                                                                                                                                                                                                                                                                                                                                                                                                                                                                                                                                                                                                                                                                                                                                                                                                                                                                                                           |

1  
2  
3  
4  
5  
6  
7  
8  
9  
10  
11  
12  
13  
14  
15  
16  
17  
18  
19  
20  
21  
22  
23  
24  
25  
26  
27  
28  
29  
30  
31  
32  
33  
34  
35  
36  
37  
38  
39  
40  
41  
42  
43  
44  
45  
46  
47  
48  
49  
50  
51  
52  
53  
54  
55  
56  
57  
58  
59  
60

|  |                                       |
|--|---------------------------------------|
|  | potential, executive function, growth |
|  |                                       |

SCHOLARONE™  
Manuscripts

For peer review only



1  
2  
3 **Does early vitamin B12 supplementation improve neurodevelopment and**  
4 **cognitive function in childhood and into school age; a study protocol for**  
5 **extended follow-ups from randomized controlled trials in India and Tanzania**  
6  
7  
8  
9

10 Corresponding author:

11 **Tor Arne Strand**, Department of Research, Innlandet Hospital Trust, Anders Sandvigs gate 17  
12 2609 Lillehammer, Norway, e-mail: [tor.strand@uib.no](mailto:tor.strand@uib.no) phone: +47 90971086  
13

14 Authors:

15 **Brita Askeland Winje**, Department of vaccine preventable diseases, Norwegian Institute of Public  
16 Health, Oslo, Norway, [brita.winje@fhi.no](mailto:brita.winje@fhi.no)  
17

18 **Ingrid Kvestad**, Regional Centre for Child and Youth Mental Health and Child Welfare, Uni Research  
19 Health, Bergen, Norway, [Ingrid.Kvestad@uib.no](mailto:Ingrid.Kvestad@uib.no)  
20

21 **Srinivasan Krishnamachari**, Division of Mental Health & Neurosciences, St. John's Research Institute,  
22 Bangalore, 560034 India, [srinivasanstjohns@gmail.com](mailto:srinivasanstjohns@gmail.com)  
23

24 **Karim Manji**, Department of Pediatrics and Child Health, Muhibili University of Health and Allied  
25 Sciences, Dar es Salaam, Tanzania, [kpmanji@gmail.com](mailto:kpmanji@gmail.com)  
26

27 **SunitaTaneja**, Centre for Health Research and Development, Society of Applied Studies, New Delhi,  
28 India, [sunita.taneja@sas.org.in](mailto:sunita.taneja@sas.org.in)  
29

30 **David C Bellinger**, Children's Hospital Boston, Boston, MA, USA,  
31 [David.Bellinger@childrens.harvard.edu](mailto:David.Bellinger@childrens.harvard.edu)  
32  
33

34 **Nita Bhandari**, Centre for Health Research and Development, Society of Applied Studies, New Delhi,  
35 India, [Nita.Bhandari@sas.org.in](mailto:Nita.Bhandari@sas.org.in)  
36

37 **Shruti Bisht**, Centre for Health Research and Development, Society of Applied Studies, New Delhi,  
38 India, [shruti.bisht@sas.org.in](mailto:shruti.bisht@sas.org.in)  
39

40 **Anne Marie Darling**, Department of Global Health and Population, Harvard T.H. Chan School of  
41 Public Health, Boston, MA, USA, e-mail: [adarling@hsph.harvard.edu](mailto:adarling@hsph.harvard.edu)  
42

43 **Christopher P Duggan**, Children's Hospital Boston, Boston, MA, USA, e-mail:  
44 [christopher.duggan@childrens.harvard.edu](mailto:christopher.duggan@childrens.harvard.edu)  
45

46 **Wafaie Fawzi**, Department of Global Health and Population, Harvard T.H. Chan School of Public  
47 Health [mina@hsph.harvard.edu](mailto:mina@hsph.harvard.edu)  
48

49 **Mari Hysing**, Regional Centre for Child and Youth Mental Health and Child Welfare, Uni Research  
50 Health, Bergen, Norway, [Mari.Hysing@uni.no](mailto:Mari.Hysing@uni.no)  
51

52 **Tivendra Kumar**, Centre for Health Research and Development, Society of Applied Studies, New  
53 Delhi, India, e-mail: [drtivendra@gmail.com](mailto:drtivendra@gmail.com)  
54

55 **Anura Kurpad**, Division of Nutrition, St. John's Research Institute, Bangalore-560034, India,  
56  
57

1  
2  
3 [a.kurpad@sjri.res.in](mailto:a.kurpad@sjri.res.in)

4  
5 **Christopher R Sudfeld**, Department of Global Health and Population, Harvard T.H. Chan School of  
6 Public Health, Boston, MA, USA e-mail: [csudfeld@hsph.harvard.edu](mailto:csudfeld@hsph.harvard.edu)

7  
8 **Erling Svensen**, Haukeland University Hospital, Helse Bergen, Bergen, Norway,  
9 [Erling.Svensen@uib.no](mailto:Erling.Svensen@uib.no)

10  
11 **Susan Thomas**, Division of Mental Health & Neurosciences, St. John's Research Institute, Bangalore,  
12 560034, India, [susansusmi@gmail.com](mailto:susansusmi@gmail.com)

13  
14 **Tor Arne Strand**, Centre for International Health, Faculty of Medicine, University of Bergen, Bergen,  
15 Norway, e-mail: [tor.strand@uib.no](mailto:tor.strand@uib.no)

16  
17  
18  
19  
20  
21  
22  
23  
24  
25  
26  
27  
28  
29  
30  
31  
32  
33  
34  
35  
36  
37  
38  
39  
40  
41  
42  
43  
44  
45  
46  
47 Word count excluding title page, abstract, references, figures and tables: 3642 words  
48  
49  
50  
51  
52  
53  
54  
55  
56  
57  
58  
59  
60

## ABSTRACT

### Introduction

As many as 250 million children under the age of five may not be reaching their full developmental potential partly due to poor nutrition during pregnancy and the first 2 years of life. Micronutrients, including vitamin B12, are important for the development of brain structure and function; however, the timing, duration, and severity of deficiencies may alter the impact on functional development outcomes. Consequently, to fully explore the effect of vitamin B12 on cognitive function it is crucial to measure neurodevelopment at different ages, in different populations and with vitamin B12 supplementation at different times during the critical periods of neurodevelopment.

### Methods and analysis

In this project we follow-up children from four recently completed randomized-placebo controlled trials of oral vitamin B12 supplementation, two in India and two in Tanzania, to explore the long-term effects on neurodevelopmental outcomes and growth. All the included trials provided at least two recommended dietary allowances (RDA) of oral vitamin B12 daily for at least six months. Vitamin B12 was supplemented either during pregnancy, early infancy or early childhood. Primary outcomes are neurodevelopmental status, cognitive function and growth later in childhood. We apply validated and culturally appropriate instruments to identify relevant developmental outcomes. All statistical analyses will be done according to intention to treat principles. The project provides an excellent opportunity to examine the effect of vitamin B12 supplementation in different periods during early life and measure the outcomes later in childhood.

### Ethics and dissemination

The study has received ethical approvals from all relevant authorities in Norway, USA, Tanzania and India and complies fully with ethical principles for medical research. Results will be presented at national and international research and policy meetings, and published in peer-reviewed scientific journals, preferably open access.

**Registration** Original trials are registered. There are no new exposures in the follow-up study.

Original trial registrations are NCT00641862 (Bangalore), NCT00717730, updated CTRI/2016/11/007494 (Delhi), and NCT00197548 and NCT00421668 (Dar es Salaam).

### Key words

Vitamin B12; neurodevelopment; cognitive function; event related potential; executive function, growth

## STRENGTHS AND LIMITATIONS OF THE STUDY

- The current project takes advantage of recently completed randomized-placebo controlled trials to study long-term effects of oral vitamin B12 supplementation on neurodevelopmental outcomes and growth in children in Tanzania and India.
- The project provides an excellent opportunity to examine the effect of vitamin B12 supplementation during different periods of the critical first 1000 days and measure the outcomes later in childhood.
- The studies were not designed to follow the children up beyond the time of supplementation, which may lead to a somewhat high rate of loss to follow-up.
- The effect measures may be difficult to standardize across the different studies.

## INTRODUCTION

New estimates based on proxy measures of stunting and poverty indicates that as many as 250 million children under the age of five from developing countries are at risk of not fulfilling their developmental potential partly because of poor nutrition during pregnancy and the first 2 years of life.<sup>1</sup> Malnutrition and micronutrient deficiencies represent a major challenge to child health in many low- and middle-income countries (LMICs) and are associated with suboptimal cognitive function and poor growth.<sup>2</sup> Many children in South Asia and Africa suffer from deficiencies of several nutrients including vitamin B12.<sup>3-7</sup>

### **Why vitamin B12 may be important for the developing brain**

Vitamin B12 plays a key role in normal brain development and function and is required for the folate-dependent enzyme, methionine synthase, which is necessary for the synthesis of methionine from homocysteine (tHcy).<sup>8</sup> Methionine in its activated form, S-adenosylmethionine, is the major methyl group donor used in human methylation reactions, including methylation of DNA and RNA. Deficient methylation reactions in the central nervous system can impair the methylation of myelin basic protein in the central as well as peripheral nervous system.<sup>9</sup> The production of myelin is a key component of brain development from gestation, throughout childhood and well into middle age.<sup>10</sup> The myelination of the brain is of importance for multiple brain systems and is highly related to neurodevelopment and subsequent cognitive functioning.<sup>11</sup> Vitamin B12 also serves as a cofactor in

1  
2  
3 numerous catalytic reactions in the human body, which are required for neurotransmitter synthesis  
4 and functioning. Vitamin B12 deficiency may cause pernicious anemia with similar effects on  
5 cognitive development and functioning as anemia caused by iron deficiency.<sup>12</sup> Vitamin B12 deficiency  
6 can also result in neuropathy through degeneration of nerve fibers and irreversible brain damage.<sup>13</sup>  
7 However, albeit subtle vitamin B12 deficiency is very common, the degree to which it has significant  
8 consequences for neurodevelopment and cognitive function is not established.<sup>14 15</sup>  
9  
10  
11  
12  
13

### 14 **Vitamin B12 and neurodevelopment**

15 There is ample evidence that vitamin B12 is important for cognitive development.<sup>11</sup> In observational  
16 studies among adults and elderly, low levels of vitamin B12 are associated with cognitive decline and  
17 dementia.<sup>16</sup> Although there are fewer observational studies in children, the association between  
18 vitamin B12 status and cognitive functioning has also been documented from early infancy to  
19 adolescence. Neonatal severe vitamin B12 deficiency causes failure to thrive and possible irreversible  
20 neurological manifestations.<sup>12 17</sup> A study in the Netherlands showed that infants fed on a macrobiotic  
21 diet, which is low on vitamin B12, had delayed gross motor, speech and language development  
22 compared to infants on an omnivore diet.<sup>18</sup> In adolescence, these same children who were fed a  
23 macrobiotic diet for the six first years of life had poorer performance on cognitive tests, independent  
24 of their current vitamin B12 status, compared to adolescents who were fed on an omnivorous diet.<sup>19</sup>  
25 In an Indian infant cohort, we also demonstrated that poor vitamin B12 status was associated with  
26 lower scores on the Mental Development Index in the Bayley Scales of Infant and Toddler  
27 Development 2<sup>nd</sup> edition.<sup>4</sup> In a study from Nepal, we were able to demonstrate associations  
28 between early vitamin B12 status (2-12 months) and cognitive functioning five years later.<sup>20</sup> These  
29 long-term associations remained strong, even after adjusting for several potential confounders.  
30 There is also evidence for the significance of vitamin B12 to the developing brain in a few clinical  
31 trials. In a RCT Indian children aged 6-30 months were administered placebo or approximately twice  
32 the recommended daily allowances of vitamin B12 and/or folic acid for six months. Children provided  
33 with vitamin B12 and folic acid scored higher on a neurodevelopment assessment compared to the  
34 placebo group.<sup>21</sup> The effects were most prominent in stunted children or children less than 2 years  
35 of age. A favorable effect of vitamin B12 was also demonstrated on motor development in two RCT's  
36 involving Norwegian infants with developmental regressions and signs of vitamin B12 deficiency one  
37 and six months following a 400 µg injection of vitamin B12.<sup>22 23</sup>  
38  
39  
40  
41  
42  
43  
44  
45  
46  
47  
48  
49  
50  
51  
52  
53  
54

### 55 **Knowledge gaps**

56 There is a need to clarify to what extent improving vitamin B12 status impacts developmental  
57  
58  
59  
60

1  
2  
3 outcomes in children in LMICs. It is also important to identify populations in which such interventions  
4 can be beneficial and at what age vitamin B12 administration is most effective.<sup>11</sup> Most studies in this  
5 field have used only motor function tests or general neurodevelopment assessments<sup>21 22 24</sup>, while  
6 less is known on the effect of B12 on specific cognitive functions such as executive functions,  
7 attention, and sensorimotor and visuospatial abilities.<sup>20</sup> The functions and areas under development  
8 are most sensitive to negative influences, and will provide the most specific outcomes in  
9 assessments.<sup>25 26</sup> Consequently, to fully understand findings in developmental assessments, we must  
10 consider the developmental timing of an exposure, in this case vitamin B12 supplementation (or lack  
11 thereof), as well as the timing of the assessment.<sup>25</sup> Measuring neurodevelopment at different ages,  
12 in different populations and the effect of exposure at different times during the critical periods of  
13 neurodevelopment is needed to understand the role of B12 in cognition.  
14  
15  
16  
17  
18  
19  
20

21 Research on the impact of B12 on the neurophysiological outcomes in children is scarce. Event  
22 Related Potential (ERP) are non-invasive, reliable measures of neurophysiological brain function<sup>27</sup>,  
23 that provide direct measure of underlying neural activity of higher mental processes. Behavioral  
24 assessments may sometimes not be sensitive enough to detect these small changes in brain  
25 functions<sup>28</sup> and these neurophysiological processes may be important correlates of the cognitive  
26 abilities and give new insight into the nutritional impact on the developing brain.<sup>29</sup>  
27  
28  
29  
30  
31  
32

### 33 **STUDY OBJECTIVES**

34 The aim of the current study, the Vitabeginning project, is to determine the long-term effects of  
35 vitamin B12 supplementation given during the first 1000 days of life on neurodevelopmental  
36 outcomes and growth.  
37  
38  
39  
40

#### 41 **General objective**

- 42 ● To provide evidence for the role of vitamin B12 supplementation in pregnancy or early  
43 childhood on neurodevelopment in vulnerable children in low and-middle income countries  
44 (LMICs).  
45  
46  
47

#### 48 *Specific objectives and objectives of the separate studies*

- 49 ● In North Indian children 6 to 30 months at enrollment, measure to what extent six months'  
50 administration of vitamin B12 (1.8 µg) with or without folic acid (150 µg) improves  
51 neurodevelopment and cognitive function five years after the end of supplementation. Age range  
52 at follow-up is 7-9 years.  
53  
54  
55  
56 ● In South Indian children, measure to what extent administration of daily vitamin B12 (50 µg) in  
57  
58  
59

1  
2  
3 combination with iron and folic acid from 14 weeks gestational age through six weeks post-  
4 partum improves neurodevelopment, cognition and neurophysiological function in childhood. Age  
5 range at follow-up is 5 - 6.5 years.

- 6  
7 ● In Tanzanian children, measure to what extent administration of vitamin B12 (50 µg) given with  
8 other vitamins from 11-17 weeks gestational age until delivery improves neurodevelopment and  
9 cognitive function up to school age. Age range at follow-up is 11-15 years.
- 10  
11 ● In Tanzanian children, measure to what extent administration of vitamin B12 (1 mg) given with  
12 other vitamins from week 6 to 18 months of age improves neurodevelopment and cognitive  
13 function up to school age. Age range at follow-up is 7-10 years.
- 14  
15 ● To estimate the effect of vitamin B12 administration on certain domains of neurodevelopment  
16 using pooled data from all of the above studies.

## 17 18 19 20 21 **METHODS AND ANALYSIS**

### 22 **Study design and interventions**

23  
24 This study is a follow-up of four recently completed double blind randomized-placebo controlled  
25 trials conducted in lower socioeconomic, semi-urban and urban populations in Delhi, India<sup>21 30</sup>,  
26 Bangalore, India<sup>31</sup> and in Dar es Salaam, Tanzania<sup>32 33</sup> in 2001 to 2011. All trials provided at least  
27 two recommended dietary allowances (RDA) of vitamin B12 daily (2 x 2.6 µg for adults and 9 µg for  
28 small children) for at least six months, with no B12 supplementation in the placebo groups. The two  
29 studies that enrolled pregnant women provided the highest dose of vitamin B12 (50 µg daily, which  
30 is approximately 20 times the RDA). An overview of the original trials and the follow-ups is presented  
31 in Table 1.

32  
33  
34  
35  
36  
37  
38  
39 In Bangalore, South-India, HIV-negative pregnant women recruited before or at 14 weeks gestational  
40 age were randomized to receive a daily dose of oral B12 (50 µg) or a placebo through 6 weeks post-  
41 partum. The primary objective was to determine the effect of vitamin B12 supplementation in  
42 improving maternal B12 status. Enrollment was completed in September 2010, and the last enrolled  
43 infant was born in August 2011. Oral B12 supplementation of women throughout pregnancy and  
44 early lactation, in combination with standard prenatal care with routine supplementation of iron and  
45 folate, significantly increased the B12 status of women and their offspring.<sup>31</sup> Neurodevelopment was  
46 measured at 9 and 30 months. In this follow-up study, we will measure the effect of maternal B12  
47 supplementation on neurodevelopment and cognitive function several times 5-6.5 years after  
48 supplementation, and on neurophysiological outcomes using event-related potential (ERP).

1  
2  
3  
4  
5  
6  
7  
8  
9  
10  
11  
12  
13  
14  
15  
16  
17  
18  
19  
20  
21  
22  
23  
24  
25  
26  
27  
28  
29  
30  
31  
32  
33  
34  
35  
36  
37  
38  
39  
40  
41  
42  
43  
44  
45  
46  
47

Table. 1 Overview of study populations, study period and exposure in the original trials and in the Vitabeginning follow-up study

| Characteristics                    | Bangalore                                                              | Delhi                                                             | Dares Salaam                                                |                                                 |
|------------------------------------|------------------------------------------------------------------------|-------------------------------------------------------------------|-------------------------------------------------------------|-------------------------------------------------|
| <b>ORIGINAL TRIALS</b>             |                                                                        |                                                                   |                                                             |                                                 |
| Trial registration number          | NCT00641862                                                            | NCT00717730                                                       | NCT00197548                                                 | NCT00421668                                     |
| Intervention period                | 09.2010-08.2011                                                        | 01.2010-03.2011                                                   | 08.2001- 02.2005                                            | 07.2007- 05. 2011                               |
| Original sample size               | 366                                                                    | 1000                                                              | 8468                                                        | 2400                                            |
| Exposure                           | B12 <sup>a</sup>                                                       | B12 and/or folic acid <sup>b</sup>                                | Maternal MV <sup>c</sup>                                    | MV and/or zinc <sup>d</sup>                     |
| Timing of exposure                 | Pregnancy<br>(daily supplement from <14 wk ga through 6 wk postpartum) | Infancy/early childhood<br>(daily supplement for 6 m from 6-30 m) | Pregnancy<br>(daily supplement from 11-17wk until delivery) | Infancy<br>(daily supplement from 6 wk to 18 m) |
| <b>VITABEGINNING FOLLOW-UPS</b>    |                                                                        |                                                                   |                                                             |                                                 |
| Expected sample size               | 230                                                                    | 800-900                                                           | 366                                                         | 446                                             |
| Age range at follow-up             | 5-6.5 yrs                                                              | 7-9 yrs                                                           | 11-15 yrs                                                   | 7-10 yrs                                        |
| Start date of enrollment           | 01.2015                                                                | 10.2016                                                           | 07.2015                                                     | 07.2015                                         |
| Expected date for study completion | Estimated 07.2017                                                      | Estimated 11.2017                                                 | Estimated 11.2017                                           | Estimated 11.2017                               |

<sup>a</sup> From < 14 wk gestational age to 6 wk post-partum B12 50 µg daily. In addition, all women were given iron and folic acid supplementation throughout pregnancy

<sup>b</sup> From 6-30 months for 6 months; four group: B12, B12 + folic acid, folic acid and placebo, doses >12 months: B12 1.8 µg and Folic acid 150 µg (half doses for <12 months).

<sup>c</sup> From 12-27 wk gestational age until delivery: Multivitamin (MV) B12 50 µg, B1 20mg, B2 20mg, B6 25 mg, Niacin 100mg, Vit-C 500 mg, Vit-E 30 mg, Folic acid 0.8 mg

<sup>d</sup> From 6 wk to 18 months, four groups; multivitamin (MV), MV + Zinc, Z and placebo. MV<6m: B12 1mg, B1 0.5mg, B2 0.6mg, B60.6mg, niacin 4mg, folic acid 130µg, Vit-C 60mg, Vit-E 8mg. Zinc5 mg. > 6 m MV and zinc doses were double



1  
2  
3  
4 In Delhi, North India, children 6-30 months of age recruited from the were randomized to receive  
5 daily (i) B12, (ii) B12 and folate, (iii) folate, or (iv) placebo for six months. The supplementation  
6 included B12 (1.8 µg) and/or folate (150 µg) and with half doses for children < 12 months. The  
7 primary objective was to measure the effect of these interventions on the incidence of diarrhea and  
8 pneumonia. Neurodevelopment was a predefined secondary outcome and was measured in a sub-  
9 sample of 422 children. In total 1000 children were enrolled between January 2010 and September  
10 2011. B12 and folic acid supplemented children scored significantly higher on neurodevelopment  
11 scores at the age of 12-36 months, compared to those who received placebo.<sup>21</sup> In this follow-up  
12 study we will measure to what extent early supplementation of folic acid and/or B12 improves  
13 neurodevelopment and cognitive function 5-6 years after supplementation. The study is powered to  
14 measure the effect of, vitamin B12, folic acid and the two vitamins combined on  
15 neurodevelopmental outcomes. The follow-up study will also measure to what extent vitamin D  
16 status in early life is associated with neurodevelopmental scores in early school years.

17  
18  
19  
20  
21  
22  
23  
24  
25  
26 In Dar es Salaam, Tanzania, infants 6-10 weeks of age born to HIV-negative mothers were  
27 randomized to receive daily (i) zinc, (ii) multivitamin, (iii) zinc +multivitamin, or (iv) placebo.  
28 Multivitamins included B12 1 mg, B1 0.5 mg, B2 0.6 mg, B6 0.6 mg, niacin 4 mg, folic acid 130 µg, Vit-  
29 C 60 mg and Vit-E 8 mg and was provided alongside zinc 5 mg. Doses were doubled after 6 months.  
30 Children were followed for 18 months (i.e. until age 19.5 months). The primary objective was to  
31 measure the incidence of diarrhea and respiratory tract infections. Enrollment was completed in  
32 December 2009, and follow-up ended in May 2011. Neurodevelopmental outcomes were assessed  
33 in a subset of children at 15 months.<sup>32</sup> Daily zinc supplementation lowered the burden of diarrhea  
34 and respiratory tract infections. No added benefit was seen from the provision of multivitamins.<sup>33</sup>

35  
36  
37  
38  
39  
40  
41 In another trial in Dar es Salaam, Tanzania on micronutrients and adverse pregnancy outcomes, HIV-  
42 negative pregnant women at 12-27 weeks gestational age were randomized to receive daily oral  
43 supplementation of multivitamins including B12 or placebo. Multivitamins included B12 50 µg, B1  
44 20mg, B2 20 mg, B6 25 mg, Niacin 100 mg, vit-C 500 mg, Vit-E 30 mg and folic acid 0.8 mg. All women  
45 received prenatal iron and folate supplementation. The primary objective was to measure the effect  
46 of vitamin supplementation on fetal loss, low birthweight and severe preterm birth. Enrollment was  
47 completed in July 2004, and the last enrolled infant was born in February 2005. Multivitamin  
48 supplementation reduced the incidence of low birth weight and small for-gestational-age births, but  
49 had no significant effects on prematurity or fetal death.<sup>34</sup> The two studies from Tanzania are well  
50 suited for follow-up studies on potential impact of micronutrient supplementation on child health

and neurodevelopmental outcomes in older children.

## Outcomes

Neurodevelopment, cognitive function, and linear growth will be key outcomes in the different studies.

### *Neurodevelopment*

Neurodevelopmental status in young children has been assessed by the comprehensive assessment tool Bayley Scales of Infant and Toddler Development 3rd ed. (Bayley- III)<sup>35</sup> and the easily administered screening tool Ages and Stages Questionnaire 3rd ed. (ASQ-3) in the original studies.<sup>21</sup>

In the follow-up, each site use their own unique collections of tests and questionnaires (Table 2). General intellectual functioning is assessed by a modified Kaufmann ABC II (Bangalore and Dar es Salaam), the Wechsler Preschool and Primary Scale of Intelligence–III (WPPSI III) (Bangalore) or the Wechsler Intelligence Scale for Children VI, Indian version (WISC-IV<sup>India</sup>) (Delhi). These are complemented by tests on specific cognitive functions by subtests from the developmental neuropsychological test battery NEPSY-II including attention and executive functioning, language, social perception, sensorimotor and visuospatial processing (Delhi), and adaptive functioning by the Vineland Social Maturity Scale (VSMS) (Bangalore). Mental health and behavior problems are measured by the parent reported screening instrument Strengths and Difficulties Questionnaire (SDQ), and executive functions by the parent reported questionnaire Behavior Rating Inventory of Executive Function (BRIEF (all sites). Finally, in one study (Bangalore) we measure neurophysiological functions using event related potentials as this may yield additional information on the effects of nutritional deficiencies on brain function. In the present study we propose to use two well characterized ERPs, P-300 and Mis-match Negativity (MMN) that are known to reflect higher cognitive functions of attention and memory. See table 2 for details on the assessments at each site.

### *Anthropometry*

Weight and height are measured using standard methods. In Delhi, height, weight and skin fold thickness were measured in children, using Seca scales (height/weight) and Holtain Calipers. In Bangalore weights of mothers and children were recorded using a digital balance (Salter's 9016; Tonbridge) to the nearest 100g, and the heights were measured using a stadiometer to the nearest 0.1 cm.

Table 2. Overview over inventories and data-collection tools utilized in the different studies and the

age of assessment

| Outcomes to be measured                        | Bangalore      | Delhi    | Dares Salaam |          |
|------------------------------------------------|----------------|----------|--------------|----------|
| Vitamin B12 exposure                           | Pregnancy      | Child    | Pregnancy    | Child    |
| Outcomes to be measured                        | Age, yrs       | Age, yrs | Age, yrs     | Age, yrs |
| <b>General abilities</b>                       |                |          |              |          |
| Modified KABC-II <sup>a</sup> EACABT®          | 5, 6           |          | 11-15        | 7-10     |
| WISC-IV <sup>INDIA</sup>                       |                | 7-9      |              |          |
| <b>Verbal abilities</b>                        |                |          |              |          |
| Crichton Vocabulary Scale, Hindi edition       |                | 7-9      |              |          |
| <b>Neurophysiological tests</b>                |                |          |              |          |
| Event related potential <sup>b</sup>           | 6              |          |              |          |
| <b>Neuropsychological tests</b>                |                |          |              |          |
| NEPSY II                                       |                | 7-9      |              |          |
| <b>Questionnaires</b>                          |                |          |              |          |
| Brief <sup>c</sup>                             | 5.5            | 7-9      | 11-15        | 7-10     |
| Strengths and Difficulties Questionnaire (SDQ) | 6.5            | 7-9      | 11-15        | 7-10     |
| Vineland Social Maturity Scale (VSMS)          | 5              |          |              |          |
| <b>Maternal assessment</b>                     |                |          |              |          |
| Demography                                     | 5              | 7-9      | 11-15        | 7-10     |
| Anthropometry                                  | 5, 5.5, 6, 6.5 |          | 11-15        | 7-10     |
| Home environment                               | 5.5            |          | 11-15        | 7-10     |
| <b>Nutrition</b>                               |                |          |              |          |
| 24 hour diet recall form                       | 5, 5.5, 6, 6.5 | 7-9      |              |          |
| Anthropometry                                  | 5, 5.5, 6, 6.5 | 7-9      | 11-15        | 7-10     |
| Household food security questionnaire          | 5, 6           |          |              |          |
| <b>Medical morbidity</b>                       |                |          |              |          |
| Morbidity questionnaire                        | 5, 5.5, 6, 6.5 |          | 11-15        | 7-10     |
| <b>Biomarkers</b>                              |                |          |              |          |
| Vitamin B12                                    | 5, 6           | 7-9      |              | 6-24m *  |
| **CBC, MMA, HcY, RBC folate, CRP               | 5, 6           | 7-9      |              |          |
| ***H                                           | 5, 6           | 7-9      | 11-15        | 7-10     |

<sup>a</sup> In Bangalore: Atlantis, Number recall, Word Order, Pattern Reasoning and Triangles from KABC and Koh's Block Design Test and Verbal Fluency in addition, in Dares Salaam: The East African Cognitive Assessment battery (EACABT®) with permission from Savings Brain Multisite study (WHO/BMGF) including Atlantis, Hand Movements, Footsteps, Story completion, KILIFI Naming test, ROCF, NOGO, Shift, People Search, Literacy and Numeracy, HOME, Brief-P (modified from MAL-ED), SDQ, Behavior Questionnaire for Parents (BQP), in addition to Verbal Fluency and, Koh's Block

<sup>b</sup> ENBIO 32, Brain monitoring and stimulation technologies, mis-match negativity, P300

<sup>c</sup> Different versions utilized in different sites: in Bangalore: Brief Parent, In Delhi: Brief 2<sup>nd</sup> ed., in Dares Salaam: Saving Brains/Gates/WHO modified version from the malaria study,

\* On stored serum samples from Child II cohort (subject to funding)

\*\* CBC, complete blood count; MMA, methylmalonic acid; HcY, homocysteine; RBC folate, red blood cell folate analysis; CRP, c reactive protein

\*\*\* H, hemoglobin

### Sample size calculation

The data for our most relevant tests are expected to be normally distributed. We have decided that a

1  
2  
3 standardized effect size of 0.35 standard deviations (SD) is the minimally clinically relevant effect for  
4 the main psychometric tests. If the smallest group in any of our comparisons includes at least 130  
5 children in each arm, and assuming a two-sided alpha error of 0.05 we will have 81%, 89%, and 98%  
6 power to detect differences for effect sizes of 0.35, 0.4, and 0.6, respectively. As a result, all of the  
7 described studies have sufficient power to detect important differences between vitamin B12 and  
8 placebo recipients, between individuals with poor and adequate vitamin B12 status or between other  
9 groups of other exposures as long as each of the groups contain at least 130 children. Statistical  
10 powers according to standardized mean effect sizes of .35, .4 and .6 and total sample sizes are  
11 depicted in figure 1. This graph was generated using the “power twomeans” command in STATA  
12 version 13, it assumes equal group sizes and equal variances, and a significance level of 0.05.  
13  
14  
15  
16  
17  
18  
19

20 < Insert figure 1 about here >  
21  
22

### 23 **Data collection**

24 Data-collection for the primary and secondary outcomes are synchronized and selected to capture  
25 the same domains of development using different tools. Assessment tools for cognitive functions  
26 such as general abilities, achievement, verbal-, visual spatial and sensorimotor skills, memory,  
27 executive functioning, general behavior and social perception and maturity are dependent on the  
28 child’s age. We have carefully selected well-validated and developmentally sensitive instruments to  
29 ensure detection of the relevant predictors according to age and research questions. Instruments are  
30 adapted to ensure psychometric qualities, as well as cultural and linguistic appropriateness of the  
31 test at each site. Clinically useful tests will be prioritized, to improve sustainability of test material  
32 and knowledge of developmental assessment at the specific sites. Assessments are administered by  
33 trained psychologists in the Indian sites and by trained health care workers in the Tanzania site. A  
34 group of experienced scientists with expertise in developmental, neuropsychological and  
35 neurophysiological assessments are responsible for the training and standardization in the different  
36 sites.  
37  
38  
39  
40  
41  
42  
43  
44  
45  
46

### 47 **Analysis plan**

48 Several domains will be measured and compared between the study groups within each of the  
49 studies. In these analyses, we will initially use the Students t-test for the crude analyses, but also  
50 multiple linear regression models to adjust for potential baseline differences and when measuring  
51 effect modification.  
52  
53  
54  
55  
56  
57  
58  
59  
60

1  
2  
3 Each of the studies has several outcomes as we will compare both linear and ponderal growth, in  
4 addition to all the above-mentioned neurodevelopmental measures between the study groups.  
5  
6 Thus, there will be several comparisons from each study and negative and positive effects will be  
7 reported in order to avoid focusing on spurious positive findings.  
8  
9

10 For each of the planned publications, we will make a detailed plan of analysis before commencing  
11 the analysis. In these plans, we will include sections on how to deal with multiple comparisons and  
12 whether post hoc adjustments will be done. In addition to these standard per protocol analysis, we  
13 will consider Instrumental Variable Analysis (IVA) in an attempt to estimate the true effect of vitamin  
14 B12 had it been given to all participants in the scheduled doses and intervals. The random allocation  
15 will be the instrument in these analyses. For per protocol analysis, participants who received less  
16 than 50% of the projected doses during the period of intervention will not be included in the  
17 analyses, well acknowledging that the ensuing effect estimates may not only be biased but will  
18 certainly represent an effect higher than what can be achieved even in our well-resourced study  
19 setting.  
20  
21  
22  
23  
24  
25  
26  
27

28 For our subgroup analyses, we will include interaction terms to measure whether or not the  
29 subgrouping variable significantly modifies the effect of the exposure of interest. All of our analyses  
30 will initially be done according to intent to treat.  
31  
32  
33

34 We will not be able to retain the complete number of children from these studies. We will compare  
35 the features of the population that is included in this analysis with the population that we failed to  
36 reenroll into the study. We will also detect risk factors for poor neurodevelopment in multiple linear  
37 or binomial regression models. We will include socioeconomic and seasonal factors and dietary  
38 intake as exposures in the analyses. A significance level of 0.05 will be used.  
39  
40  
41  
42  
43

## 44 ETHICS AND DISSEMINATION

### 45 **Ethical and safety considerations**

46 The exposures under investigation in this study were included in the original trials. We have obtained  
47 ethical approval of all new research activities in this follow-up study, from Norway and from the  
48 participating countries. Informed written parental consent will be taken from one or both parents of  
49 participating children prior to enrollment in the follow-up study and assent will be obtained from  
50 children older than 7 years in the Delhi site. Parents unable to read or write will be encouraged to  
51 bring along a literate relative or neighbor as an impartial witness.  
52  
53  
54  
55  
56  
57  
58  
59  
60

### Relevance and benefit to society

The current project takes advantage of four recently completed randomized-placebo controlled trials, to study the long-term effects of vitamin B12 supplementation on neurodevelopmental outcomes and growth in children in low- and middle-income countries. When measuring the effect of vitamin B12 on growth and development long term follow-up is important: Vitamin B12 can be stored for years in the body, and the effect of an increased intake for a relatively short period such as 6 months may accordingly last much longer. Furthermore, for many of the neurodevelopmental outcomes, it might not be possible to estimate the effect of early life exposures until later in childhood because of limitations in the assessment tools. Thus, to follow children for a long time, as in this project, is important to fully understand the role of vitamin B12 for brain development and growth.

In most studies, follow-up for several years is not possible, so the results from our studies will be of great importance. Since none of the RCTs originally were designed for such long term follow-up, there is risk that loss to follow-up can bias our effect estimates. There is, however, no reason to believe that the loss to follow-up rate will be different according to randomized regimen in any of the described studies. The risk of confounding of the main exposures (Vitamin B12 supplementation) is small because of the RCT design and the large number of randomization units. Substantial imbalances of potential confounding factors across study groups are unlikely.

If positive effects of supplementation are observed, this may constitute important contributions to improve childhood nutrition in many low and middle-income countries. However, several factors may have profound impact on long-term neurodevelopment outcomes and growth and potentially dilute the effect of optimizing B12 status in early life. Our findings, however, must be interpreted in light of the results from other RCTs that are measuring the effect of vitamin B12 supplementation on growth and development. If anything, our findings will guide our next step in understanding the role of vitamin B12 nutrition on child growth and development: Should there be additional follow-ups in the ongoing studies, or will the results from our studies discourage further studies on vitamin B12 and child health?

It should also be emphasized the value of negative findings from this large project. If none, or very few, of our several outcomes respond to vitamin B12 supplementation, alone or when given in combination with several other micronutrients, then poor vitamin B12 status is likely not an important contributor to impaired neurodevelopment.

1  
2  
3 Millions of children across the world grow up malnourished lacking essential nutrients, with high  
4 burden of infectious diseases and where parents may not have the resources to provide an optimal  
5 environment for nurturing care. Acting in early childhood, these factors may result in poorer chances  
6 for later success in school and work. The results from the RCTs can lead to dietary recommendations  
7 that can improve learning and academic achievements, which again can lift individuals from the  
8 vicious cycle of poverty and malnutrition. Programs designed to prevent or treat micronutrient  
9 deficiencies can be targeted toward specific recommendations. Any further evidence for the long-  
10 term effect of dietary supplements has potentially high impact and may provide sustainable  
11 improvements in health and equity.  
12  
13  
14  
15  
16  
17

18 The suggested studies are geared towards rapid dissemination of results into national and  
19 international child health promotion programs. We will actively use the potential influence of the  
20 international collaborators to ensure that our results reach the relevant health authorities.  
21  
22  
23  
24

#### 25 **Planned publications**

26 Study results will be presented at national and international research and policy meetings, and  
27 published in peer-reviewed scientific journals, preferably open access. We will also discuss  
28 alternative strategies to inform the public. We will publish scientific papers as a consortium,  
29 specifically directed towards developmental and neuropsychological assessment methodology, and  
30 site specific publications. We expect each of the sites to generate approximately five publications in  
31 high ranked international peer reviewed journals.  
32  
33  
34  
35  
36  
37

#### 38 **AUTHOR'S CONTRIBUTIONS**

39 TAS, IK, CPD, and WF took the initial initiative for the study. TAS, IK, CPD, WF, BAW, SK, KM, ST, MH,  
40 NB and ES, were involved in developing the design and the study protocol, ST, SK and KM are  
41 responsible for setting up the study conduct in each site, with support from AMD, ST, TK, AK and SB.  
42 The statistical approach of the study was drafted by CRS, MH, TAS, and WFMH, IK, ES, DCB, and SK  
43 were responsible for the cognitive assessments included in the protocol. All authors approved the  
44 final version of the protocol. BAW, IK and TAS drafted the current manuscript. All authors have  
45 reviewed and accepted the final version of the manuscript.  
46  
47  
48  
49  
50  
51

#### 52 **FUNDING STATEMENT**

53 The Vitabeginning study was funded by the Norwegian Research Council Grant number 234495.  
54  
55  
56  
57  
58  
59  
60

### Funding of the original trials

The original trial in Bangalore was funded by the Indian Council of Medical Research grant 5/7/192/06-RHN and Eunice Kennedy Shriver National Institute of Child Health and Human Development grants R03 HD054123. The study in Delhi was funded by the Thrasher Research Fund (grant 02827), and the Research Council of Norway (project 172226). The trials in Tanzania were funded by National Institute of Child Health and Human Development (NICHD R01 37701 (pregnancy) and the Eunice Kennedy Shriver National Institute of Health grant R01 HD048969-01 (child). CPD is supported by NIH grants K24DK104676.

### COMPETING INTERESTS STATEMENT

None declared

### FIGURE LEGENDS

Figure 1. Estimated required total sample sizes based on relevant effect sizes

### REFERENCES

1. Black MM, Walker SP, Fernald LCH, et al. Early childhood development coming of age: science through the life course. *Lancet* 2017;389(10064):77-90. doi: 10.1016/S0140-6736(16)31389-7
2. Black MM. Micronutrient deficiencies and cognitive functioning. *J Nutr* 2003;133(11 Suppl 2):3927S-31S.
3. Bhan MK, Sommerfelt H, Strand T. Micronutrient deficiency in children. *Br J Nutr* 2001;85 Suppl 2:S199-203.
4. Taneja S, Bhandari N, Strand TA, et al. Cobalamin and folate status in infants and young children in a low-to-middle income community in India. *Am J Clin Nutr* 2007;86(5):1302-09. doi: 86/5/1302 [pii]
5. Allen LH. How common is vitamin B-12 deficiency? *Am J Clin Nutr* 2009;89(2):693S-6S. doi: 10.3945/ajcn.2008.26947A
6. Ulak M, Chandyo RK, Adhikari RK, et al. Cobalamin and folate status in 6 to 35 months old children presenting with acute diarrhea in Bhaktapur, Nepal. *PLoS One* 2014;9(3):e90079. doi: 10.1371/journal.pone.0090079
7. Ulak M, Chandyo RK, Thorne-Lyman AL, et al. Vitamin Status among Breastfed Infants in Bhaktapur, Nepal. *Nutrients* 2016;8(3):149. doi: 10.3390/nu8030149
8. Ueland PM, Mosen AL. Hyperhomocysteinemia and B-vitamin deficiencies in infants and children. *Clin Chem Lab Med* 2003;41(11):1418-26. doi: 10.1515/CCLM.2003.218
9. Weir DG, Scott JM. Brain function in the elderly: role of vitamin B12 and folate. *Br Med Bull* 1999;55(3):669-82.
10. Stiles J, Jernigan TL. The basics of brain development. *Neuropsychol Rev* 2010;20(4):327-48. doi: 10.1007/s11065-010-9148-4
11. Black MM. Effects of vitamin B12 and folate deficiency on brain development in children. *Food Nutr Bull* 2008;29(2 Suppl):S126-S31.
12. Dror DK, Allen LH. Effect of vitamin B12 deficiency on neurodevelopment in infants: current



- knowledge and possible mechanisms. *NutrRev* 2008;66(5):250-55. doi: NURE031 [pii];10.1111/j.1753-4887.2008.00031.x [doi]
13. Calvaresi E, Bryan J. B vitamins, cognition, and aging: a review. *J Gerontol B Psychol Sci Soc Sci* 2001;56(6):P327-39.
  14. van de Rest O, van Hooijdonk LW, Doets E, et al. B vitamins and n-3 fatty acids for brain development and function: review of human studies. *AnnNutrMetab* 2012;60(4):272-92. doi: 000337945 [pii];10.1159/000337945 [doi]
  15. Finkelstein JL, Layden AJ, Stover PJ. Vitamin B-12 and Perinatal Health. *Adv Nutr* 2015;6(5):552-63. doi: 10.3945/an.115.008201
  16. Selhub J, Morris MS, Jacques PF, et al. Folate-vitamin B-12 interaction in relation to cognitive impairment, anemia, and biochemical indicators of vitamin B-12 deficiency. *AmJClinNutr* 2009;89(2):702S-06S. doi: ajcn.2008.26947C [pii];10.3945/ajcn.2008.26947C [doi]
  17. Bjorke Monsen AL, Ueland PM. Homocysteine and methylmalonic acid in diagnosis and risk assessment from infancy to adolescence. *Am J Clin Nutr* 2003;78(1):7-21.
  18. Schneede J, Dagnelie PC, van Staveren WA, et al. Methylmalonic acid and homocysteine in plasma as indicators of functional cobalamin deficiency in infants on macrobiotic diets. *PediatrRes* 1994;36(2):194-201. doi: 10.1203/00006450-199408000-00010 [doi]
  19. Louwman MW, van DM, van de Vijver FJ, et al. Signs of impaired cognitive function in adolescents with marginal cobalamin status. *AmJClinNutr* 2000;72(3):762-69.
  20. Kvestad I, Hysing M, Shrestha M, et al. Vitamin B-12 status in infancy is positively associated with development and cognitive functioning 5 y later in Nepalese children. *Am J Clin Nutr* 2017;105(5):1122-31. doi: 10.3945/ajcn.116.144931
  21. Kvestad I, Taneja S, Kumar T, et al. Vitamin B12 and Folic Acid Improve Gross Motor and Problem-Solving Skills in Young North Indian Children: A Randomized Placebo-Controlled Trial. *PLoS One* 2015;10(6):e0129915. doi: 10.1371/journal.pone.0129915
  22. Torsvik I, Ueland PM, Markestad T, et al. Cobalamin supplementation improves motor development and regurgitations in infants: results from a randomized intervention study. *Am J Clin Nutr* 2013;98(5):1233-40. doi: 10.3945/ajcn.113.061549
  23. Torsvik IK, Ueland PM, Markestad T, et al. Motor development related to duration of exclusive breastfeeding, B vitamin status and B12 supplementation in infants with a birth weight between 2000-3000 g, results from a randomized intervention trial. *BMC Pediatr* 2015;15:218. doi: 10.1186/s12887-015-0533-2
  24. Strand TA, Taneja S, Ueland PM, et al. Cobalamin and folate status predicts mental development scores in North Indian children 12-18 mo of age. *Am J Clin Nutr* 2013;97(2):310-7. doi: 10.3945/ajcn.111.032268
  25. Walder D, JC S, Pulsifer M. Neurodevelopmental Assessment. Evidence-Based Practice in Infant and Early childhood Psychology 2009:167-205.
  26. Thompson RA, Nelson CA. Developmental science and the media. Early brain development. *AmPsychol* 2001;56(1):5-15.
  27. Light GA, Willians, L.E., Minow, F., Sprock, J., Rissling, A., Sharp, R., Swerdlow, N.R., Braff, D.L. Electroencephalography (EEG) and Event-Related Potentials (ERPs) with Human Participants. *Current Protocols in Neuroscience* 2010;6.25.1-6.25.24 doi: <https://www.ncbi.nlm.nih.gov/entrez/eutils/elink.fcgi?dbfrom=pubmed&retmode=ref&cmd=prlinks&id=20578033> [published Online First: July 2010]
  28. Uauy R, Peirano P. Breast is best: human milk is the optimal food for brain development. *Am J Clin Nutr* 1999;70(4):433-4.
  29. deRegnier RA, Long JD, Georgieff MK, et al. Using event-related potentials to study perinatal nutrition and brain development in infants of diabetic mothers. *Dev Neuropsychol* 2007;31(3):379-96. doi: 10.1080/87565640701229524
  30. Taneja S, Strand TA, Kumar T, et al. Folic acid and vitamin B-12 supplementation and common infections in 6-30-mo-old children in India: a randomized placebo-controlled trial. *AmJClinNutr* 2013 doi: ajcn.113.059592 [pii];10.3945/ajcn.113.059592 [doi]

- 1  
2  
3 31. Duggan C, Srinivasan K, Thomas T, et al. Vitamin B-12 supplementation during pregnancy and  
4 early lactation increases maternal, breast milk, and infant measures of vitamin B-12 status. *J*  
5 *Nutr* 2014;144(5):758-64. doi: 10.3945/jn.113.187278  
6 32. Locks LM, Manji KP, McDonald CM, et al. The effect of daily zinc and/or multivitamin  
7 supplements on early childhood development in Tanzania: results from a randomized  
8 controlled trial. *Matern Child Nutr* 2017;13(2) doi: 10.1111/mcn.12306  
9 33. McDonald CM, Manji KP, Kisenge R, et al. Daily Zinc but Not Multivitamin Supplementation  
10 Reduces Diarrhea and Upper Respiratory Infections in Tanzanian Infants: A Randomized,  
11 Double-Blind, Placebo-Controlled Clinical Trial. *J Nutr* 2015;145(9):2153-60. doi:  
12 10.3945/jn.115.212308  
13 34. Fawzi WW, Msamanga GI, Urassa W, et al. Vitamins and perinatal outcomes among HIV-negative  
14 women in Tanzania. *N Engl J Med* 2007;356(14):1423-31. doi: 10.1056/NEJMoa064868  
15 35. Srinivasan K, Thomas T, Kapanee AR, et al. Effects of maternal vitamin B12 supplementation on  
16 early infant neurocognitive outcomes: a randomized controlled clinical trial. *Matern Child*  
17 *Nutr* 2017;13(2) doi: 10.1111/mcn.12325  
18 36. Kvestad I, Taneja S, Kumar T, et al. The assessment of developmental status using the Ages and  
19 Stages questionnaire-3 in nutritional research in north Indian young children. *Nutr J*  
20 2013;12:50. doi: 1475-2891-12-50 [pii];10.1186/1475-2891-12-50 [doi]  
21  
22  
23  
24  
25  
26  
27  
28  
29  
30  
31  
32  
33  
34  
35  
36  
37  
38  
39  
40  
41  
42  
43  
44  
45  
46  
47  
48  
49  
50  
51  
52  
53  
54  
55  
56  
57  
58  
59  
60

1  
2  
3  
4  
5  
6  
7  
8  
9  
10  
11  
12  
13  
14  
15  
16  
17  
18  
19  
20  
21  
22  
23  
24  
25  
26  
27  
28  
29  
30  
31  
32  
33  
34  
35  
36  
37  
38  
39  
40  
41  
42  
43  
44  
45  
46  
47  
48  
49  
50  
51  
52  
53  
54  
55  
56  
57  
58  
59  
60

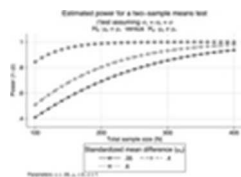

Figure 1. Estimated required total sample sizes based on relevant effect sizes

9x7mm (300 x 300 DPI)

For peer review only
